# Supplementary material for: A Method for Analyzing Hand‐Transmitted Vibration Characteristics in the Hand‐Arm Parts When Operating the Portable Pneumatic Extinguisher
Source: Hindawi journal article supplement (doi:10.1155/2019/9402539), 2019-01-01
Supplement: f1 [file 9402539.f1.zip]

Archive with 3 entries (3 files):
- 9402539.f1/Supplementary Material 1.CSV
- 9402539.f1/Supplementary Material 2.CSV
- 9402539.f1/Supplementary Material 3.CSV
