# Supplementary material for: A Method for Analyzing Hand‐Transmitted Vibration Characteristics in the Hand‐Arm Parts When Operating the Portable Pneumatic Extinguisher
Source: Hindawi journal article supplement (doi:10.1155/2019/9402539), 2019-01-01
Supplement: f1 [file 9402539.f1.zip › 9402539.f1/Supplementary Material 1.CSV]

RA1000	ID= 1090063
Data No.= 95
Memory
Data num= 1050
Sampling= 500 us
Step= 1
CH.1-A=	FFT	ON	100m/s^2	OFF	OFF	DC
CH.2-A=	FFT	ON	100m/s^2	OFF	OFF	DC
CH.3-A=	FFT	ON	100m/s^2	OFF	OFF	DC
Time(us)	CH1-A(m/s^2)	CH2-A(m/s^2)	CH3-A(m/s^2)
-1000	0.4469	-0.075	0.2406
-500	0.8344	-0.0031	0.3313
0	1.0125	0.5969	0.6313
500	1.2969	1.1531	0.4156
1000	1.6344	0.9313	0.3094
1500	1.6219	0.9281	0.5813
2000	1.7781	0.1156	0.2406
2500	2.1813	-0.4531	0.0906
3000	1.9906	-0.0969	0.5594
3500	1.9438	-1.025	0.2438
4000	2.2062	-0.8125	0.2
4500	1.9156	-0.8344	0.725
5000	1.8656	-1.3062	0.2406
5500	1.9563	-1.1031	0.1469
6000	1.5219	-0.9281	0.6156
6500	1.3813	-0.8438	0.1437
7000	1.2969	0.1375	0.0969
7500	0.7094	0.1563	0.6156
8000	0.5469	-0.4156	0.2375
8500	0.6031	0.2781	0.1844
9000	-0.025	1.1125	0.6563
9500	-0.2188	1.1563	0.2781
10000	-0.175	1.9719	0.1875
10500	-0.7594	2.1594	0.5875
11000	-0.7969	1.8125	0.3
11500	-0.5281	2.6063	0.2625
12000	-1.0719	2.2219	0.5406
12500	-0.9313	1.0688	0.3531
13000	-0.6875	1.3781	0.3719
13500	-1.0813	1.0375	0.6438
14000	-0.9438	-0.5344	0.4313
14500	-0.3594	-1.5656	0.3625
15000	-0.8719	-1.9969	0.45
15500	-0.8031	-1.6594	0.4437
16000	-0.1437	-1.1063	0.2781
16500	-0.575	-0.95	0.4844
17000	-0.3406	-1.0125	0.5063
17500	0.1344	-1.2125	0.4688
18000	-0.375	-0.5313	0.4219
18500	-0.2594	0.0469	0.5063
19000	0.2156	-0.8188	0.3906
19500	-0.3313	-1.2563	0.3688
20000	-0.3094	-0.5719	0.4719
20500	0.0938	-0.1781	0.3563
21000	-0.4063	-0.6719	0.3219
21500	-0.3812	-0.9313	0.5719
22000	-0.1344	0.2656	0.4906
22500	-0.625	0.5219	0.3281
23000	-0.5719	0.1219	0.6625
23500	-0.2313	0.4656	0.4531
24000	-0.7844	-0.7906	0.3031
24500	-0.8063	-1.1313	0.6844
25000	-0.4969	0.4969	0.5
25500	-0.9781	-0.0219	0.3688
26000	-0.9156	-0.9125	0.925
26500	-0.5437	0.2125	0.5688
27000	-0.9938	0.6062	0.4875
27500	-0.8125	0.0344	0.9656
28000	-0.4969	-0.0156	0.4437
28500	-0.8469	0.0031	0.3656
29000	-0.6313	-0.5813	0.8625
29500	-0.3594	0.3594	0.4219
30000	-0.6188	1.4719	0.3313
30500	-0.3969	0.6594	0.8469
31000	-0.0125	0.9875	0.5375
31500	-0.2281	1.0031	0.3656
32000	0.0313	0.6719	0.6719
32500	0.1531	1.4969	0.2875
33000	-0.0938	1.0938	0.1594
33500	0.1156	0.5156	0.5031
34000	0.4313	0.8813	0.2656
34500	0.3031	0.7563	0.2313
35000	0.4781	1.2813	0.5813
35500	0.7094	1.825	0.3156
36000	0.6094	1.0219	0.275
36500	0.6219	0.9719	0.4156
37000	0.775	0.3531	0.2719
37500	0.7625	-0.5313	0.1563
38000	0.7906	-0.6563	0.3313
38500	0.8469	-1.0781	0.2938
39000	0.8781	-0.8813	0.2125
39500	0.9125	-0.2562	0.2906
40000	1.0688	-0.65	0.3625
40500	1.0844	-0.2656	0.2781
41000	1.1187	0.0406	0.2438
41500	1.0688	-0.5563	0.2125
42000	1.0594	-0.3938	0.0844
42500	0.9156	-0.8594	0.05
43000	0.8125	-1.1625	0.1969
43500	0.7844	-1.4156	0.1156
44000	0.5	-0.9656	0.05
44500	0.3313	-0.4188	0.2969
45000	0.2813	-0.5281	0.1
45500	-0.0844	0.8688	-0.0844
46000	-0.1969	1.45	0.2125
46500	-0.2	0.2094	-0.0469
47000	-0.6344	0.5531	-0.2062
47500	-0.8313	1.0313	0.3187
48000	-0.8938	0.4031	-0.0031
48500	-1.3	0.6813	-0.1531
49000	-1.3438	0.1187	0.3781
49500	-1.3281	-0.6281	-0.0375
50000	-1.7125	0.2156	-0.175
50500	-1.7156	0.6281	0.3531
51000	-1.5656	-0.0031	-0.0156
51500	-1.8656	-0.5844	-0.025
52000	-1.7531	-0.075	0.4719
52500	-1.4406	0.2313	0.1437
53000	-1.6875	0.1906	0.0344
53500	-1.4875	0.6719	0.3594
54000	-1.025	0.7719	0.0437
54500	-1.2219	0.9031	-0.0375
55000	-0.9031	1.5813	0.3531
55500	-0.3719	1.7031	0.0688
56000	-0.5281	1.5719	0.0406
56500	-0.2313	1.4656	0.3969
57000	0.5313	1.0906	0.1625
57500	0.2813	0.775	0.1125
58000	0.6594	0.8406	0.3031
58500	1.3438	0.7312	0.0656
59000	1.1406	0.4219	0.0875
59500	1.4875	0.425	0.2781
60000	2.0187	0.35	0.275
60500	1.7469	-0.1281	0.2219
61000	1.8719	-0.2406	0.375
61500	2.4781	-0.1344	0.3656
62000	2	-0.6531	0.3688
62500	2.0563	-0.8625	0.3219
63000	2.3563	0.0844	0.3219
63500	1.7844	-0.2188	0.2844
64000	1.7656	-0.8063	0.2938
64500	2.1188	-0.4688	0.4406
65000	1.2844	-0.8719	0.3688
65500	1.2281	-1.3625	0.3
66000	1.3094	-0.7156	0.4375
66500	0.6188	-0.8875	0.3063
67000	0.5844	-2.0125	0.1563
67500	0.5813	-2.1313	0.4094
68000	-0.225	-1.1281	0.1719
68500	-0.3969	-1.6656	0.125
69000	-0.2625	-2.1094	0.4656
69500	-1.1719	-2.4063	0.2062
70000	-1.4063	-3.0469	0.0969
70500	-1.5156	-2.675	0.4781
71000	-2.2687	-2.2844	0.1
71500	-2.5219	-2.1875	-0.0375
72000	-2.5313	-2.6094	0.2938
72500	-3.1688	-2.1719	-0.0875
73000	-3.3594	-0.1469	-0.1437
73500	-3.275	0.2875	0.4063
74000	-3.7156	-0.1563	-0.0125
74500	-3.8875	0.5844	-0.1094
75000	-3.7156	1.0094	0.2625
75500	-3.9813	0.8844	-0.1844
76000	-3.9719	0.9438	-0.2688
76500	-3.75	0.2969	0.1781
77000	-3.8625	-0.3125	-0.2219
77500	-3.6031	0.4156	-0.2219
78000	-3.3	1.3406	0.225
78500	-3.1531	0.075	-0.1594
79000	-2.7813	-0.7125	-0.2594
79500	-2.3719	0.3656	0.0063
80000	-2.0844	2.0406	-0.15
80500	-1.5406	1.6656	-0.1844
81000	-0.9187	1.6563	0.075
81500	-0.6563	2.7062	-0.1063
82000	-0.1281	2.3125	-0.1875
82500	0.45	2.8	0.0313
83000	0.9219	2.7813	-0.075
83500	1.3813	0.7312	-0.1688
84000	1.8531	-0.2531	-0.0781
84500	2.2594	1.1	-0.0563
85000	2.5844	1.0906	-0.0281
85500	3.0406	-1.3625	0.0875
86000	3.3781	-1.8281	0.175
86500	3.4906	-0.575	0.0781
87000	3.6719	-0.9438	0.1031
87500	3.9469	-0.95	0.1531
88000	3.8281	-1.1594	0.075
88500	3.8688	-1.8938	0.0781
89000	3.7531	-2.3656	0.2062
89500	3.4562	-0.7656	0.2313
90000	3.2219	-1.1406	0.125
90500	3.0094	-3.3531	0.3844
91000	2.3281	-2.375	0.1563
91500	1.8687	-1.1969	0.0688
92000	1.5531	-1.6531	0.3187
92500	0.85	-1.5438	0.125
93000	0.3219	-1.4219	0.025
93500	-0.075	-1.1625	0.4594
94000	-0.7719	0.0469	0.1938
94500	-1.2531	0.9094	0.0563
95000	-1.4656	0.4594	0.5063
95500	-2.2687	-0.3844	0.075
96000	-2.5125	0.475	-0.0188
96500	-2.7	1.8531	0.4594
97000	-3.2	1.6156	-0.0125
97500	-3.275	1.6812	-0.025
98000	-3.0938	2.5875	0.5313
98500	-3.3969	2.9906	0.0313
99000	-3.2406	3.3188	0.0875
99500	-2.6375	3.2594	0.4563
100000	-2.8563	2.5375	0.1313
100500	-2.4531	1.8313	0.0063
101000	-1.7563	1.8344	0.325
101500	-1.775	1.8563	0.0688
102000	-1.275	0.6938	0.1
102500	-0.4219	0.5938	0.4219
103000	-0.3438	1.25	0.225
103500	0.2875	1.2688	0.1906
104000	1.3156	1.6563	0.4344
104500	1.3656	2.0969	0.2531
105000	1.9	1.7063	0.1656
105500	2.9219	1.2563	0.2906
106000	2.8469	1.9438	0.1844
106500	3.3344	1.8344	0.1594
107000	4.1281	0.6094	0.3563
107500	3.9125	-0.1156	0.3812
108000	4.2094	0.225	0.3
108500	4.7688	-0.0563	0.3688
109000	4.2969	-0.8531	0.3812
109500	4.3938	-1.0188	0.3281
110000	4.6531	-2.0938	0.3406
110500	3.9156	-2.6531	0.5313
111000	3.825	-1.1406	0.5125
111500	3.8969	-0.8906	0.5625
112000	2.9781	-2.775	0.6906
112500	2.5406	-1.9594	0.5531
113000	2.3937	-0.2062	0.5344
113500	1.4438	-0.7594	0.7531
114000	1.1375	-0.8844	0.5094
114500	0.7937	-0.2938	0.3594
115000	-0.2188	-0.5281	0.7219
115500	-0.6094	-0.2156	0.45
116000	-0.8188	0.8688	0.375
116500	-1.7469	-0.6781	0.7688
117000	-2.0563	-2.5844	0.375
117500	-2.4094	-1.2969	0.2531
118000	-3.1719	-0.6375	0.625
118500	-3.4094	-2.0531	0.1094
119000	-3.4813	-1.725	-0.0063
119500	-4.0438	-1.3594	0.5563
120000	-4.15	-0.9906	0.0656
120500	-4.1281	0.3281	-0.0313
121000	-4.3656	0.7312	0.4
121500	-4.4375	-0.0656	-0.0938
122000	-4.1594	-0.2125	-0.2594
122500	-4.3438	0.1031	0.0531
123000	-4.1813	0.3094	-0.3469
123500	-3.8312	0.1875	-0.4938
124000	-3.8531	0.675	-0.1375
124500	-3.4531	1.0719	-0.3906
125000	-2.9562	1.2688	-0.4469
125500	-2.6813	1.8938	-0.2594
126000	-2.2031	2.1375	-0.5031
126500	-1.6156	2.3312	-0.6531
127000	-1.2281	2.5438	-0.4063
127500	-0.7781	1.7188	-0.5625
128000	-0.2062	2.1688	-0.6594
128500	0.3219	2.5656	-0.3875
129000	0.7563	1.6812	-0.4406
129500	1.4438	2.3188	-0.5188
130000	1.9031	1.5438	-0.4219
130500	2.3156	1.5	-0.4063
131000	2.7969	2.0031	-0.475
131500	3.1813	0.4719	-0.325
132000	3.2969	0.2281	-0.2125
132500	3.6031	-0.5625	-0.2344
133000	3.9063	-1.5969	-0.2906
133500	3.9844	-0.675	-0.1594
134000	4.0563	-1.1812	-0.2062
134500	4.2281	-1.3469	-0.2938
135000	3.9344	-0.4625	0.0063
135500	3.8344	-1.2219	-0.0563
136000	3.7469	-1.4406	-0.1813
136500	3.2406	-1.575	0.0906
137000	2.9656	-2.5531	-0.1844
137500	2.7719	-1.8844	-0.3563
138000	1.9813	-1.3438	-0.0031
138500	1.5656	-1.6563	-0.2438
139000	1.2188	-1.2719	-0.3438
139500	0.3938	-1.4937	0.1187
140000	-0.0844	-1.8094	-0.2625
140500	-0.4969	-1.2906	-0.4188
141000	-1.3531	-1.5031	0.0781
141500	-1.8813	-1.0875	-0.4156
142000	-2.1281	-0.5344	-0.5219
142500	-2.9438	-0.4938	0.0094
143000	-3.3281	-0.2125	-0.425
143500	-3.4156	0.0125	-0.5156
144000	-4.1063	0.4	-0.0094
144500	-4.2531	0.6719	-0.4688
145000	-4.1	0.8438	-0.6188
145500	-4.5969	0.7312	-0.2031
146000	-4.5	0.7	-0.4656
146500	-4.0375	0.5813	-0.5938
147000	-4.4375	0.0875	-0.2219
147500	-4.1031	0.2938	-0.5094
148000	-3.575	0.3969	-0.6125
148500	-3.675	0.0594	-0.3938
149000	-3.1563	0.0281	-0.6031
149500	-2.3937	-0.0156	-0.6125
150000	-2.4406	-0.1906	-0.3406
150500	-1.8844	1.2219	-0.3438
151000	-1.0719	0.9812	-0.4719
151500	-1.0906	1.3594	-0.3969
152000	-0.5156	2.1125	-0.4437
152500	0.5281	1.9563	-0.5219
153000	0.4437	3.2031	-0.3344
153500	1.0562	2.9844	-0.3156
154000	1.9469	3.2156	-0.2938
154500	1.8438	3.2719	-0.1938
155000	2.2844	2.0313	-0.1688
155500	2.9813	1.7031	-0.1688
156000	2.7938	0.0594	-0.1656
156500	3.1375	-1.4375	0.0188
157000	3.7219	-0.5125	0.0344
157500	3.4688	-1.4281	0.05
158000	3.6969	-2.2094	0.3781
158500	4.0094	-1.7063	0.3281
159000	3.5875	-2.3969	0.2531
159500	3.5781	-2.7469	0.5875
160000	3.6844	-2.7594	0.3313
160500	3.025	-3.9219	0.2906
161000	2.8438	-3.8312	0.6375
161500	2.6719	-2.7156	0.4094
162000	1.9344	-1.7594	0.3656
162500	1.6719	-1.3281	0.8219
163000	1.4719	-0.9031	0.3531
163500	0.5906	0.2875	0.2438
164000	0.1625	-0.3031	0.6406
164500	-0.1938	-0.6938	0.2125
165000	-1.1656	-0.9531	0.0219
165500	-1.6688	-3.0563	0.4531
166000	-2.2031	-4.2844	0.0969
166500	-3.0438	-4.075	-0.0531
167000	-3.5938	-3.6094	0.5
167500	-3.9781	-3.2469	0.1094
168000	-4.6594	-2.4531	-0.0219
168500	-5.1	-1.3687	0.3625
169000	-5.3719	-0.4344	-0.0594
169500	-5.7438	0.5437	-0.1938
170000	-5.9	0.3281	0.1594
170500	-5.9344	-0.1938	-0.15
171000	-6.0375	1.1156	-0.1688
171500	-6.0344	1.9875	-0.0375
172000	-5.7906	1.6031	-0.175
172500	-5.5531	1.8719	-0.4156
173000	-5.2813	1.65	-0.2813
173500	-4.6156	1.9656	-0.3781
174000	-4.0219	3.3438	-0.3969
174500	-3.475	2.1406	-0.2875
175000	-2.7844	1.2219	-0.2719
175500	-2.0031	2.3937	-0.3187
176000	-1.3406	1.3656	-0.2438
176500	-0.5094	0.4656	-0.2719
177000	0.2625	1.1187	-0.3313
177500	0.7469	0.6062	-0.3063
178000	1.5094	0.2375	-0.2031
178500	2.2219	0.5	-0.25
179000	2.7125	-0.5281	-0.1469
179500	3.2625	-1.5844	-0.05
180000	3.8438	-0.0688	-0.1156
180500	4.0094	0.8031	-0.2
181000	4.4531	-0.275	0.05
181500	4.8906	-0.1125	-0.0188
182000	4.6844	0.2719	-0.0969
182500	4.8563	-0.625	0.2781
183000	4.9781	0.0094	0.0844
183500	4.5469	0.3031	-0.0875
184000	4.5188	-1.0031	0.2438
184500	4.5687	-1.3344	-0.0344
185000	3.9	-0.5656	-0.0938
185500	3.6813	-0.4437	0.3969
186000	3.5625	-0.0063	0.1313
186500	2.8344	-0.2313	0.0063
187000	2.4219	-0.9281	0.5031
187500	2.2094	-0.7688	0.1125
188000	1.3469	-0.5719	0
188500	0.8969	-0.7344	0.4156
189000	0.6656	-0.9875	-0.0156
189500	-0.2531	-0.2656	-0.0844
190000	-0.5813	-0.4531	0.3719
190500	-0.7156	0.2906	-0.0125
191000	-1.5813	0.75	-0.0344
191500	-1.7281	0.4094	0.3125
192000	-1.6469	1.8719	-0.1156
192500	-2.2938	1.6781	-0.1406
193000	-2.4063	1.2844	0.0688
193500	-2.1875	2.1563	-0.25
194000	-2.75	1.1625	-0.3281
194500	-2.7656	0.6656	-0.125
195000	-2.2719	0.375	-0.2531
195500	-2.7188	-0.4406	-0.3031
196000	-2.5187	-0.3938	-0.0938
196500	-1.9406	-0.5344	-0.2594
197000	-2.2969	-0.3781	-0.3719
197500	-2.0094	0.3469	-0.1969
198000	-1.3344	-0.7969	-0.2438
198500	-1.6563	-1.5344	-0.2313
199000	-1.3656	-0.7813	-0.2
199500	-0.6656	-1.1563	-0.2156
200000	-0.9656	-1.5094	-0.2813
200500	-0.7375	-1.3406	-0.2313
201000	-0.1625	-0.9594	-0.2406
201500	-0.4406	-0.3969	-0.225
202000	-0.1906	-0.4094	-0.2188
202500	0.3688	-0.9	-0.0156
203000	-0.025	-0.8375	-0.1406
203500	0.1969	-0.0125	-0.2469
204000	0.5219	0.125	-0.0031
204500	0.1125	-0.9344	-0.1969
205000	0.1813	-1.675	-0.2188
205500	0.4719	-1.0094	0.175
206000	-0.1281	-0.5781	-0.0031
206500	-0.0563	-1.2344	-0.1187
207000	0.0469	-1.2625	0.3781
207500	-0.4719	-0.4188	0.0469
208000	-0.475	0.1063	-0.1469
208500	-0.3844	0.0063	0.4156
209000	-0.7719	0.1906	0.0031
209500	-0.8063	0.2656	0
210000	-0.6781	0.9938	0.5344
210500	-0.9281	1.3906	0.2156
211000	-0.875	2.175	0.0719
211500	-0.7188	2.2813	0.4938
212000	-0.7406	2.5375	0.1
212500	-0.5469	4.1531	0.0156
213000	-0.0531	4.275	0.375
213500	0.0406	3.5812	0.1
214000	0.3938	3.9375	0.0406
214500	0.8094	3.9906	0.4156
215000	1.0344	3.3688	0.1531
215500	1.4125	3.0469	0.0688
216000	1.8719	2.0625	0.3656
216500	2.1281	1.5188	0.1156
217000	2.4844	0.6375	0.1094
217500	2.8063	0.3344	0.2938
218000	3.0531	-0.3094	0.1031
218500	3.3094	-2.1219	0.1375
219000	3.5063	-2.1688	0.3938
219500	3.5531	-2.3719	0.2938
220000	3.5375	-3.1437	0.15
220500	3.5969	-2.6875	0.2219
221000	3.5094	-2.7563	0.1625
221500	3.3063	-2.6	0.0594
222000	3.1188	-1.5	0.0313
222500	2.7438	-1.2563	0.0437
223000	2.3406	-1.0438	-0.0344
223500	1.9438	-0.7031	-0.0875
224000	1.6031	-0.5531	-0.0031
224500	0.9812	0.7813	-0.1906
225000	0.5906	1.2969	-0.2406
225500	0.0813	0.7406	-0.1219
226000	-0.7	1.2875	-0.1688
226500	-1.1438	1.1906	-0.1906
227000	-1.4625	0.4125	0.05
227500	-2.1656	0.9781	-0.0031
228000	-2.525	0.6438	-0.0844
228500	-2.6531	0.5688	0.2406
229000	-3.2125	2.3469	0.0813
229500	-3.2375	2.0313	0.0188
230000	-3.1406	1.2563	0.4594
230500	-3.4125	1.0656	0.2562
231000	-3.3344	0.9938	0.25
231500	-3.075	0.8781	0.775
232000	-3.2125	0.2875	0.4625
232500	-2.8375	0.2531	0.2844
233000	-2.2469	-0.6219	0.7563
233500	-2.1656	-0.9844	0.325
234000	-1.8031	0.3688	0.2938
234500	-0.9313	-0.6438	0.7031
235000	-0.8031	-1.1719	0.3812
235500	-0.3656	-0.5938	0.2969
236000	0.3031	-2.0906	0.7125
236500	0.1469	-2.0219	0.3156
237000	0.4531	-2.0438	0.2469
237500	1.1094	-3.2969	0.5188
238000	0.8656	-2.9938	0.1437
238500	0.9688	-3.1063	0.0813
239000	1.3687	-2.7156	0.3656
239500	0.8156	-2.2844	0.1406
240000	0.7312	-3.0531	0.1563
240500	0.8719	-2.4469	0.3938
241000	0.0719	-2.7531	0.1906
241500	-0.1156	-2.7531	0.1406
242000	-0.1156	-1.0469	0.2688
242500	-0.8781	-0.8188	0.1563
243000	-1.1156	-0.3344	0.1281
243500	-1.0562	1.1281	0.225
244000	-1.9094	1.3406	0.2594
244500	-2.1063	1.4656	0.2344
245000	-1.9438	0.9156	0.2938
245500	-2.7875	0.0875	0.2688
246000	-2.9094	0.1156	0.2062
246500	-2.5594	-0.1688	0.2531
247000	-3.2313	0.2813	0.3313
247500	-3.0406	0.0875	0.1906
248000	-2.5938	-0.1156	0.2281
248500	-2.8906	1.5094	0.4313
249000	-2.4594	1.9813	0.3781
249500	-1.8188	1.2125	0.325
250000	-1.95	1.8469	0.6844
250500	-1.5688	1.3531	0.3594
251000	-0.8719	0.4437	0.1437
251500	-0.7688	0.75	0.5406
252000	-0.3938	-0.2594	0.1844
252500	0.3375	-0.5344	0.1187
253000	0.3625	-0.0781	0.6094
253500	0.8031	-0.0094	0.275
254000	1.3938	0.9781	0.0906
254500	1.3969	-0.0437	0.575
255000	1.8219	-0.9625	0.0938
255500	2.2563	-0.1437	-0.0437
256000	2.175	-0.8281	0.5344
256500	2.4031	0.1594	0.1344
257000	2.6219	0.925	-0.0031
257500	2.4031	-0.3906	0.4344
258000	2.3469	-0.2969	0.0813
258500	2.4188	0.3438	-0.0156
259000	2.1594	-0.6344	0.35
259500	2.0906	-0.9	-0.0219
260000	2.0531	-0.7188	-0.1594
260500	1.5969	-0.7469	0.2188
261000	1.3906	-0.5781	-0.0344
261500	1.2313	-0.7094	-0.0813
262000	0.8219	-0.9406	0.2656
262500	0.525	-1.0844	0.0437
263000	0.3688	-0.2313	0.0281
263500	-0.0188	0.7813	0.1281
264000	-0.2781	0.6125	0.0156
264500	-0.4094	1.1219	-0.0844
265000	-0.6438	1.6313	0.1469
265500	-0.9281	1.4125	0.0688
266000	-1.0562	1.9312	0.05
266500	-1.2125	2.2563	0.0594
267000	-1.3781	1.6688	0.15
267500	-1.3	0.8438	0.0594
268000	-1.3594	0.9906	0.0406
268500	-1.5156	0.8438	0.1156
269000	-1.3844	0.2562	0.1094
269500	-1.2688	-0.6375	0.1156
270000	-1.3031	-1.2594	0.2656
270500	-1.2406	-1.6375	0.2062
271000	-1	-1.8469	0.1219
271500	-1.0813	-1.6969	0.3781
272000	-0.8781	-2.4188	0.2219
272500	-0.5938	-2.2156	0.0094
273000	-0.7031	-0.5906	0.3313
273500	-0.5094	-0.4344	0.0813
274000	-0.1938	-1.1156	-0.0437
274500	-0.4	-0.7375	0.4094
275000	-0.2625	0.0844	0.05
275500	-0.0406	0.0063	-0.0844
276000	-0.2062	0.1437	0.3719
276500	-0.0781	0.0938	-0.0875
277000	0.1688	-0.4531	-0.2062
277500	-0.1531	-0.4844	0.2156
278000	-0.0531	0.0719	-0.1625
278500	0.1031	-0.0844	-0.2906
279000	-0.2438	-0.9969	0.3156
279500	-0.2594	-0.2719	-0.1344
280000	-0.0219	0.2562	-0.3031
280500	-0.4219	0.5781	0.1625
281000	-0.4125	1.4312	-0.2438
281500	-0.075	2.1969	-0.2875
282000	-0.4094	2.2594	0.0625
282500	-0.2562	2.6031	-0.2531
283000	0.1281	3.9	-0.3313
283500	-0.1187	3.6719	-0.0531
284000	0.1281	2.6281	-0.3594
284500	0.7094	3.2313	-0.4531
285000	0.3812	2.5219	-0.2094
285500	0.6469	1.7906	-0.4437
286000	1.3781	1.7688	-0.4094
286500	1.1594	0.5063	-0.1656
287000	1.5719	-0.075	-0.3
287500	2.2062	0.7438	-0.4063
288000	1.8938	0.4781	-0.3438
288500	2.2344	-0.7031	-0.4188
289000	2.8688	-1.5344	-0.4156
289500	2.4281	-2.2406	-0.3875
290000	2.7156	-2.1594	-0.3656
290500	3.05	-2.2062	-0.3875
291000	2.4844	-2.2438	-0.4625
291500	2.5781	-1.7375	-0.425
292000	2.8312	-0.9563	-0.55
292500	2.2219	-0.9219	-0.6188
293000	2.0938	-0.2062	-0.55
293500	2.1063	0.3344	-0.6687
294000	1.3406	-0.3	-0.6813
294500	1.1656	0.8594	-0.475
295000	1.1781	1.35	-0.6563
295500	0.3187	0.1125	-0.8594
296000	-0.0281	0.3719	-0.5563
296500	-0.1563	1	-0.8375
297000	-0.9031	-0.3938	-0.8375
297500	-1.1281	-0.6094	-0.325
298000	-1.2188	-0.0031	-0.6625
298500	-1.9188	-0.975	-0.7937
299000	-2.1437	-0.1313	-0.3844
299500	-2.1313	0.6438	-0.6813
300000	-2.6813	0.0656	-0.7875
300500	-2.7344	-0.2562	-0.2125
301000	-2.4719	0.6375	-0.6062
301500	-2.7719	1.5375	-0.6406
302000	-2.6625	1.35	-0.1406
302500	-2.3844	1.9375	-0.6594
303000	-2.4688	1.5938	-0.7937
303500	-2.1813	0.0031	-0.4188
304000	-1.8875	0.175	-0.7438
304500	-1.8313	0.2281	-0.8125
305000	-1.5375	-0.9812	-0.3406
305500	-0.9781	-0.6969	-0.6906
306000	-0.9563	-0.6531	-0.7
306500	-0.55	-1.0688	-0.3656
307000	-0.1969	-0.3344	-0.6188
307500	0.0781	0.2438	-0.7188
308000	0.3719	-0.725	-0.3406
308500	0.6563	-1.0344	-0.4875
309000	0.7438	-0.5688	-0.5531
309500	0.8469	-0.9938	-0.4156
310000	1.0844	-1.1313	-0.5156
310500	0.9438	-1.1594	-0.5875
311000	0.8531	-1.9656	-0.4219
311500	0.8562	-2.05	-0.4469
312000	0.8063	-1.3656	-0.4031
312500	0.6125	-1.3281	-0.3406
313000	0.4906	-1.8031	-0.3
313500	0.425	-2.2	-0.3
314000	0.0406	-1.6344	-0.3406
314500	-0.0437	-1.4656	-0.2406
315000	-0.3219	-1.7688	-0.3187
315500	-0.7	-1.8344	-0.375
316000	-0.9938	-1.9375	-0.1469
316500	-1.2625	-2.0688	-0.1781
317000	-1.6563	-1.7313	-0.3063
317500	-1.9813	-1.7813	-0.0531
318000	-2.2344	-1.7031	-0.2781
318500	-2.6219	-0.9906	-0.3781
319000	-2.875	-0.6281	-0.0344
319500	-2.8969	-0.0313	-0.2656
320000	-3.3344	0.1219	-0.3187
320500	-3.3344	0.0813	0.2062
321000	-3.1688	1.2375	-0.1531
321500	-3.425	1.6125	-0.3187
322000	-3.2344	1.3656	0.1875
322500	-2.9375	1.7344	-0.1125
323000	-3.0969	2.1688	-0.2031
323500	-2.6406	1.8938	0.4188
324000	-2.2062	2.0094	0.0875
324500	-2.2281	2.1	-0.0531
325000	-1.8125	1.5813	0.4656
325500	-1.0938	1.5281	0.0625
326000	-1.0375	1.8781	0.0625
326500	-0.4313	0.8	0.5938
327000	0.3281	-0.3313	0.2938
327500	0.3406	0.0563	0.2938
328000	0.7063	-0.3344	0.6938
328500	1.6219	-1.1406	0.4875
329000	1.5063	-1.2063	0.4406
329500	1.925	-1.6938	0.6938
330000	2.6344	-2.1063	0.4781
330500	2.3312	-1.2844	0.4625
331000	2.6813	-0.8688	0.675
331500	3.1844	-1.4625	0.575
332000	2.65	-1.3219	0.6781
332500	2.7219	-1.0313	0.8063
333000	3.0125	-1.0094	0.6938
333500	2.3719	-0.7312	0.6438
334000	2.2219	-0.7813	0.6906
334500	2.4438	-0.8156	0.6375
335000	1.5594	-0.1063	0.5875
335500	1.3156	0.0563	0.7188
336000	1.3344	-0.0406	0.7406
336500	0.3781	0.0156	0.7469
337000	0.0281	0.0563	0.7344
337500	0.1063	0.3625	0.8594
338000	-0.8906	0.6563	0.8406
338500	-1.1281	0.9375	0.7625
339000	-1.1156	0.4031	0.8938
339500	-1.8844	0.4125	0.7969
340000	-2.0812	0.7219	0.7312
340500	-1.8875	-0.3906	1.0313
341000	-2.4969	-0.1281	0.9156
341500	-2.5094	0.6094	0.85
342000	-2.1406	-0.2375	1.2156
342500	-2.5438	-0.0719	0.8844
343000	-2.275	0.3187	0.7219
343500	-1.9156	-0.5063	1.1344
344000	-2.075	-0.2188	0.7156
344500	-1.8125	0.1594	0.6719
345000	-1.35	-0.7719	1.0938
345500	-1.5406	-1.7594	0.7563
346000	-1.1469	-1.5094	0.675
346500	-0.8375	-1.0844	1.1375
347000	-0.9063	-1.2969	0.6594
347500	-0.6156	-1.6219	0.5531
348000	-0.375	-1.6812	0.9375
348500	-0.4594	-1.5562	0.5469
349000	-0.2781	-0.9219	0.4344
349500	-0.0906	0.2969	0.9187
350000	-0.1906	-0.1031	0.6031
350500	-0.0688	-0.0031	0.5531
351000	0.0719	1.5562	0.9313
351500	-0.15	1.95	0.5406
352000	-0.0906	1.3219	0.45
352500	0.0406	1.3062	0.7125
353000	-0.1531	1.2813	0.5219
353500	-0.1563	1.3438	0.4688
354000	-0.0406	1.7813	0.775
354500	-0.0063	1.2625	0.7031
355000	0.0594	1.1625	0.6625
355500	0.3375	1.0688	0.7813
356000	0.3531	0.9844	0.6906
356500	0.3906	1.5875	0.6969
357000	0.6281	0.2031	0.7375
357500	0.8688	-0.0625	0.7688
358000	0.8938	0.6875	0.7312
358500	1.1812	0.8406	0.7875
359000	1.5031	1.5688	0.9375
359500	1.5094	1.3	0.8906
360000	1.8031	2.2375	0.8
360500	2.0938	2.1781	0.8406
361000	2.0938	1.3281	0.7406
361500	2.3438	1.0219	0.6531
362000	2.5063	-0.1344	0.8781
362500	2.4719	-1.2781	0.7312
363000	2.4281	-0.4875	0.7063
363500	2.5219	-0.8219	1.0188
364000	2.3281	-2.6344	0.8
364500	2.1875	-1.8719	0.6563
365000	2.1531	-0.8438	0.9969
365500	1.8344	-2.0406	0.6781
366000	1.6313	-1.5906	0.5437
366500	1.4875	-1.2781	1.05
367000	0.9313	-2.2938	0.6719
367500	0.5719	-1.1187	0.5875
368000	0.3656	-0.3187	0.975
368500	-0.3156	-1.6563	0.5781
369000	-0.6094	-1.9156	0.3625
369500	-0.7344	-0.4	0.7688
370000	-1.4125	0.4281	0.375
370500	-1.5844	0.9063	0.2062
371000	-1.6063	0.9313	0.7219
371500	-2.2563	0.3313	0.3
372000	-2.4531	0.0906	0.2281
372500	-2.3344	0.4313	0.6
373000	-2.9281	0.3844	0.2531
373500	-2.925	-0.4188	0.0813
374000	-2.5344	-0.9031	0.4688
374500	-3.0031	0.2469	0.1437
375000	-2.8375	0.1813	0.15
375500	-2.3688	-0.3094	0.3656
376000	-2.7156	-0.3219	0.2125
376500	-2.5812	-1.3563	0.1938
377000	-1.9656	-2.1156	0.3875
377500	-2.2906	-2.1844	0.2031
378000	-2.0625	-2.2625	0.1469
378500	-1.4719	-3.0156	0.2469
379000	-1.8031	-2.3906	0.1656
379500	-1.6187	-1.6938	0.0563
380000	-1.0406	-1.0063	0.2125
380500	-1.3313	-0.7656	0.2344
381000	-1.0781	-0.4813	0.2438
381500	-0.5094	0.2438	0.1938
382000	-0.8625	1.1875	0.2281
382500	-0.6781	2.0469	0.1094
383000	-0.0594	1.3281	0.0094
383500	-0.3938	1.5406	0.1437
384000	-0.2094	2.2469	0.1031
384500	0.3875	1.8719	0.0625
385000	0.0156	2.3656	0.3781
385500	0.3438	1.9031	0.2969
386000	0.8531	1.775	0.2094
386500	0.6969	2.7875	0.5813
387000	1.2	1.9063	0.4188
387500	1.7781	1.8156	0.3531
388000	1.6156	2.7594	0.7625
388500	1.9625	2.1563	0.5313
389000	2.5969	1.5125	0.525
389500	2.3281	0.8063	1.125
390000	2.6344	-0.2438	0.75
390500	3.0719	-0.7063	0.725
391000	2.8312	-0.6438	1.2281
391500	3.1531	-0.2188	0.8781
392000	3.5187	-0.1437	0.7563
392500	3.2469	-0.1938	1.3094
393000	3.3281	0.4156	0.8438
393500	3.5125	-0.0688	0.8156
394000	3.1125	-0.4375	1.3281
394500	3.0219	-0.7906	0.9219
395000	2.8844	-2.0281	0.8562
395500	2.3813	-2.0094	1.2094
396000	1.9844	-1.8875	0.8625
396500	1.8219	-1.3594	0.7344
397000	1.2281	-0.9906	1.1469
397500	0.8719	-0.8031	0.8688
398000	0.5563	0.4531	0.85
398500	0.0125	0.7438	1.2219
399000	-0.3656	0.8813	0.9906
399500	-0.575	1.0844	0.9375
400000	-1.1031	0.6156	1.1187
400500	-1.4688	0.6156	0.9344
401000	-1.6063	0.3344	0.8844
401500	-1.9594	0.1094	1.0594
402000	-2.1594	0.1781	1.0406
402500	-2.2125	0.1938	1.0688
403000	-2.2969	1.0844	1.1906
403500	-2.2375	1.775	1.1906
404000	-2.1656	0.5625	1.0813
404500	-2.0844	1.3938	1.0656
405000	-2.0063	1.975	1.0781
405500	-1.6812	1.1281	1.0094
406000	-1.4531	2.125	1.0063
406500	-1.2313	2.05	1.2
407000	-0.9156	1.1344	1.1
407500	-0.6156	1.75	1.0688
408000	-0.4437	1.5031	1.2563
408500	-0.025	0.35	1.075
409000	0.3313	-0.7312	0.9
409500	0.5437	-1.0656	1.1281
410000	0.7781	-0.8438	1.0125
410500	1.2188	-1.0969	0.8719
411000	1.1938	-1.4844	1.3406
411500	1.4438	-1.7	1.0875
412000	1.7406	-2.5063	1.0781
412500	1.5656	-2.1688	1.4563
413000	1.6719	-1.8406	1.0406
413500	1.7188	-3.0344	0.8938
414000	1.2906	-3.1469	1.3188
414500	1.1438	-2.1156	0.8906
415000	1.1219	-1.3687	0.8156
415500	0.7406	-1.7938	1.3656
416000	0.4781	-1.2219	0.8875
416500	0.3656	-0.2469	0.9187
417000	-0.2094	0.25	1.2531
417500	-0.3688	1.1313	0.8656
418000	-0.3844	1.6594	0.7531
418500	-0.9938	0.9969	1.0281
419000	-1.1625	0.3438	0.6625
419500	-1.1281	1.4781	0.6219
420000	-1.775	1.55	1
420500	-1.8406	-0.1813	0.725
421000	-1.6063	0.5844	0.6687
421500	-2.1437	0.4063	0.9063
422000	-2.1063	0.3375	0.625
422500	-1.6875	1.3031	0.5469
423000	-1.9312	1	0.7094
423500	-1.7188	1.0406	0.5188
424000	-1.1938	1.5469	0.4469
424500	-1.4594	2.2344	0.6438
425000	-1.1781	1.2469	0.5406
425500	-0.6	-0.0531	0.4563
426000	-0.825	-0.3938	0.4406
426500	-0.5469	-0.9094	0.3156
427000	0.0906	-1.0594	0.1625
427500	-0.2344	-1.3563	0.1156
428000	0.0781	-1.5125	0.1187
428500	0.7531	-1.5719	-0.05
429000	0.425	-1.425	-0.025
429500	0.6938	-0.5906	0.0813
430000	1.1906	-0.3469	-0.0594
430500	0.8188	-0.4188	-0.2313
431000	0.9344	0.1469	-0.1094
431500	1.3344	0.2688	-0.3594
432000	0.8281	0.3	-0.475
432500	0.8938	0.7125	-0.1938
433000	1.1313	0.6969	-0.3906
433500	0.575	0.9187	-0.5156
434000	0.6656	1.9406	-0.1625
434500	1.0031	1.9469	-0.5188
435000	0.5219	2.1094	-0.5688
435500	0.625	1.9813	-0.1594
436000	0.8344	1.5188	-0.4688
436500	0.2969	1.025	-0.45
437000	0.3812	0.4	0.0656
437500	0.5406	0.0313	-0.3063
438000	0.0437	-1.0531	-0.4375
438500	0.1094	-1.2219	0.0719
439000	0.375	-0.4188	-0.3438
439500	-0.1344	0.3	-0.4813
440000	0.0437	0.9625	0
440500	0.2781	1.325	-0.3125
441000	0.0719	1.2844	-0.4406
441500	0.0969	1.5531	0.0063
442000	0.3812	1.7469	-0.3906
442500	0.1313	1.5562	-0.6125
443000	0.2844	1.3656	-0.2781
443500	0.4875	1.1594	-0.5938
444000	0.3094	1.6906	-0.6687
444500	0.4844	1.2469	-0.2781
445000	0.7281	0.7188	-0.5625
445500	0.6094	0.2938	-0.6625
446000	0.7312	-0.1531	-0.5031
446500	0.8562	-0.5437	-0.65
447000	0.8	-1.3344	-0.7344
447500	0.6938	-1.7313	-0.5406
448000	0.7656	-1.7281	-0.675
448500	0.6813	-1.8844	-0.6594
449000	0.4688	-1.4875	-0.5719
449500	0.5031	-1.0906	-0.6969
450000	0.2813	-1.2813	-0.7344
450500	0.0781	-0.95	-0.7937
451000	-0.0437	-0.4156	-0.7344
451500	-0.1219	-0.6781	-0.7469
452000	-0.3875	-0.8562	-0.8031
452500	-0.6219	-0.2469	-0.7594
453000	-0.8406	-0.5219	-0.9031
453500	-1.075	-0.6438	-0.9438
454000	-1.2344	-0.2188	-0.8875
454500	-1.35	-0.6594	-0.9844
455000	-1.6438	-1.2563	-1.0875
455500	-1.825	-0.6813	-0.7719
456000	-1.875	0.0938	-0.9094
456500	-2.1344	-0.5781	-1.0625
457000	-2.1375	-0.7719	-0.6969
457500	-2.1219	0.45	-1.0438
458000	-2.3281	0.5531	-1.0969
458500	-2.2156	0.9156	-0.6094
459000	-2.1219	0.6031	-0.9031
459500	-2.3875	-0.4594	-1.0031
460000	-2.3781	-0.6656	-0.5063
460500	-2.2031	-0.7813	-0.9594
461000	-2.5094	-1.0531	-1.1344
461500	-2.1906	-2	-0.5781
462000	-1.9844	-2.225	-0.9812
462500	-2.0656	-1.0063	-0.9938
463000	-1.9094	-0.6031	-0.4437
463500	-1.5875	-1.6938	-0.8938
464000	-1.6906	-1.2094	-1.0094
464500	-1.4031	-0.7719	-0.6094
465000	-0.9719	-0.4594	-1.0438
465500	-1.1563	0.0781	-1.1125
466000	-0.8938	0.3187	-0.6438
466500	-0.3844	0.7813	-0.9438
467000	-0.4906	1.2969	-1.025
467500	-0.2313	2.2687	-0.6719
468000	0.3719	2.1969	-1.0188
468500	0.125	1.1031	-1.0969
469000	0.3594	1.9906	-0.9063
469500	0.8562	2.1437	-1.0188
470000	0.6219	1.0219	-0.9844
470500	0.8625	1.8094	-0.6188
471000	1.5	1.6063	-0.75
471500	1.1125	0.6781	-0.7531
472000	1.3281	1.3406	-0.6531
472500	1.8062	0.9438	-0.7
473000	1.4031	-0.1	-0.6875
473500	1.6719	-0.1781	-0.525
474000	2.1563	-0.8188	-0.4563
474500	1.8062	-1.1281	-0.5
475000	1.7813	-0.3563	-0.4219
475500	2.2188	-0.6687	-0.4437
476000	1.7125	-1.6438	-0.475
476500	1.6844	-1.8531	-0.5656
477000	2.0656	-1.9156	-0.3719
477500	1.4719	-1.4813	-0.4688
478000	1.4656	-1.2563	-0.5125
478500	1.6938	-1.8781	-0.2969
479000	0.9875	-1.3531	-0.5281
479500	0.7719	-1.1	-0.6938
480000	0.9156	-1.775	-0.4063
480500	0.0344	-1.3687	-0.6844
481000	-0.2219	-1.9375	-0.6625
481500	-0.2219	-1.8344	-0.2875
482000	-1.0438	-0.9844	-0.5094
482500	-1.2531	-0.8562	-0.6781
483000	-1.1281	-0.2688	-0.1906
483500	-1.8094	0.5906	-0.5281
484000	-2.0344	1.7063	-0.675
484500	-1.9844	1.4031	-0.1281
485000	-2.4656	0.7312	-0.4938
485500	-2.5656	1.2406	-0.5281
486000	-2.4719	0.7031	-0.0156
486500	-2.8969	-0.0781	-0.4063
487000	-2.8438	0.8719	-0.5437
487500	-2.5531	0.3812	-0.0406
488000	-2.6719	-0.3719	-0.3344
488500	-2.4469	0.2313	-0.3375
489000	-2.1156	-0.5906	0.1469
489500	-2.1469	-0.8781	-0.2
490000	-1.8188	-0.7031	-0.2813
490500	-1.4031	-1.2188	0.0344
491000	-1.3594	-1.825	-0.225
491500	-1.0031	-1.3281	-0.2062
492000	-0.7375	0.0469	0.1281
492500	-0.6344	0.0063	-0.0406
493000	-0.4031	-0.4281	-0.0938
493500	-0.0938	0.1656	0.1375
494000	0.0625	-0.6813	-0.0719
494500	0.3219	-0.7688	-0.1719
495000	0.5	0.3719	-0.0063
495500	0.4656	-1.0562	-0.0156
496000	0.425	-2.0219	-0.0188
496500	0.4813	-0.1938	0.2125
497000	0.4844	0.3406	0.2875
497500	0.5688	-0.4813	0.225
498000	0.5969	-0.2219	0.2719
498500	0.5594	-0.0219	0.3469
499000	0.3812	-0.0156	0.3344
499500	0.5	1.3438	0.3656
500000	0.4656	1.8875	0.4906
500500	0.2656	-0.3656	0.4125
501000	0.2906	-0.9812	0.5344
501500	0.2531	1.4906	0.7406
502000	0.2	2.0594	0.6313
502500	0.25	0.7469	0.6125
503000	0.2906	1.2563	0.825
503500	0.0906	1.1906	0.5938
504000	0.325	0.3313	0.575
504500	0.5281	1.5344	0.875
505000	0.2938	1.1531	0.6781
505500	0.4719	-1.0781	0.6281
506000	0.7156	-0.0313	1.1438
506500	0.4719	1.375	0.6625
507000	0.6813	0.55	0.6188
507500	1.0719	-0.3344	1.1187
508000	0.8406	-0.275	0.6344
508500	0.9	0.5188	0.5281
509000	1.325	0.6906	1.0375
509500	1.1063	1.5344	0.6438
510000	1.2469	0.8625	0.5781
510500	1.4563	-1.1156	1.0531
511000	1.0938	-0.9438	0.6719
511500	1.0594	-0.3812	0.5469
512000	1.3813	-1.4813	0.9063
512500	0.8781	-2.5344	0.5219
513000	0.7469	-2.5656	0.4219
513500	0.8938	-2.1781	0.8031
514000	0.2906	-2.0156	0.4938
514500	0.1156	-1.8719	0.4813
515000	0.1656	-2.5094	0.6969
515500	-0.5531	-2.3906	0.4094
516000	-0.7031	-1.7781	0.3469
516500	-0.6844	-1.4188	0.4437
517000	-1.5188	-1.6406	0.2594
517500	-1.6344	-1.6125	0.1594
518000	-1.4688	-0.6531	0.2938
518500	-2.2375	0.7969	0.2531
519000	-2.4188	0.3656	0.1625
519500	-2.1313	0.2219	0.2438
520000	-2.8406	1.5031	0.125
520500	-2.6906	1.9125	0.0844
521000	-2.1563	1.4969	0.0219
521500	-2.6594	2.375	0.0156
522000	-2.5969	3.0063	0.0563
522500	-1.9375	2.2719	0.0875
523000	-2.3438	2.8656	0.15
523500	-1.9937	2.5	0.1281
