# Supplementary material for: A Method for Analyzing Hand‐Transmitted Vibration Characteristics in the Hand‐Arm Parts When Operating the Portable Pneumatic Extinguisher
Source: Hindawi journal article supplement (doi:10.1155/2019/9402539), 2019-01-01
Supplement: f1 [file 9402539.f1.zip › 9402539.f1/Supplementary Material 2.CSV]

RA1000	ID= 1090063
Data No.= 71
Memory
Data num= 1072
Sampling= 500 us
Step= 1
CH.1-A=	FFT	ON	100m/s^2	OFF	OFF	DC
CH.2-A=	FFT	ON	100m/s^2	OFF	OFF	DC
CH.3-A=	FFT	ON	100m/s^2	OFF	OFF	DC
Time(us)	CH1-A(m/s^2)	CH2-A(m/s^2)	CH3-A(m/s^2)
-12000	2.0344	3.8406	-0.4094
-11500	1.8531	3.8781	-0.1406
-11000	0.8531	4.1469	-0.3719
-10500	-0.5437	3.9875	-0.4531
-10000	-0.3938	3.9438	0.0563
-9500	0.1469	3.8219	-0.175
-9000	-0.8156	3.4031	-0.2125
-8500	-1.3563	3.0719	-0.1625
-8000	-0.7031	2.8688	-0.2
-7500	-0.5531	2.4313	-0.2156
-7000	-0.4781	2.0281	-0.1719
-6500	-0.9594	1.5063	0.3438
-6000	-2.1	1.0469	-0.0719
-5500	-1.675	0.625	-0.2125
-5000	-0.825	0.1406	0.1437
-4500	-0.7563	-0.1594	0.0656
-4000	-1.75	-0.4688	-0.0219
-3500	-2.5938	-0.8906	-0.125
-3000	-1.1781	-1.0875	0.1594
-2500	0.5781	-1.5156	0.0625
-2000	0.2031	-1.575	0.0031
-1500	-0.3156	-1.5781	0.4688
-1000	-0.1281	-1.7563	0.0125
-500	0.4375	-1.8969	0.0563
0	0.9906	-2.0187	0.2062		2.009214356	1.784853404	0.364340352
500	0.7688	-1.9969	0.1594
1000	-0.4594	-1.9063	0.1063
1500	-0.6125	-1.9813	-0.0281
2000	0.5156	-1.7844	0.4344
2500	1.4719	-1.7125	0.1563
3000	1.5406	-1.4969	0.0813
3500	0.5938	-1.1	0.375
4000	0.9781	-1.0188	0.05
4500	2.2656	-0.7312	0.0406
5000	2.7188	-0.2438	0.0625
5500	2.4594	0.0906	0.2562
6000	1.3906	0.5344	-0.0188
6500	0.0531	0.7688	-0.1531
7000	-0.6031	0.8562	0.2656
7500	-1.1063	0.9313	-0.0219
8000	-2.1219	0.8406	-0.1344
8500	-3.3531	0.7719	-0.0063
9000	-3.3656	0.7594	-0.1375
9500	-1.9781	0.4719	-0.2344
10000	-0.5063	0.4781	-0.2438
10500	-0.5688	0.2938	0.1938
11000	-0.4281	0.1313	-0.2438
11500	0.8688	0.225	-0.3938
12000	1.6906	-0.0188	-0.0125
12500	2.3406	0.05	-0.1375
13000	2.6563	0.2031	-0.2344
13500	2.7969	0.3938	-0.2
14000	3	0.7063	-0.0781
14500	3.7094	0.8344	-0.1469
15000	2.8813	1.1563	-0.1906
15500	2.0406	1.4125	0.3781
16000	1.025	1.4625	0.0813
16500	0.4656	1.6906	-0.0313
17000	-0.2969	1.6187	0.1344
17500	-2.1531	1.35	0.2188
18000	-3.6844	1.325	0.2594
18500	-4.4031	0.8156	0.225
19000	-5.8063	0.4813	0.5656
19500	-5.9969	0.0844	0.3187
20000	-5.7031	-0.6344	0.2344
20500	-6.2562	-1.0813	0.5781
21000	-5.8063	-1.775	0.2344
21500	-4.7188	-2.375	0.175
22000	-3.8594	-2.8063	0.1688
22500	-2.9938	-3.3594	0.3531
23000	-2.3813	-3.5719	0.15
23500	-1.0969	-3.8094	0.0625
24000	0.6344	-3.9469	0.4813
24500	1.0438	-3.9063	0.0313
25000	1.6594	-3.9406	0.0094
25500	2.2906	-3.825	0.1813
26000	1.9	-3.7594	0.1469
26500	2.0156	-3.5344	-0.0188
27000	1.8813	-3.1219	-0.1344
27500	1.6344	-2.7594	0.2562
28000	1.7906	-2.3063	-0.0031
28500	1.6219	-1.75	-0.1406
29000	1.3625	-1.3156	0.1844
29500	0.8531	-0.6969	-0.1156
30000	0.125	-0.2938	-0.1219
30500	0.2469	0.1594	-0.1469
31000	0.3156	0.5094	-0.0125
31500	-0.35	0.7656	-0.2438
32000	-0.4563	1.1344	-0.3281
32500	-0.0188	1.3719	0.1469
33000	0.0063	1.5031	-0.2094
33500	0.4344	1.7344	-0.2688
34000	1.0344	1.9688	-0.2594
34500	1.1094	2.0281	-0.3563
35000	0.9063	2.1688	-0.3844
35500	1.0063	2.0031	-0.4969
36000	0.6687	1.9906	-0.1344
36500	0.3031	1.9219	-0.5188
37000	-0.5938	1.5844	-0.5813
37500	-1.0781	1.5813	-0.2094
38000	0.45	1.4094	-0.4094
38500	0.4688	1.3313	-0.475
39000	0.7188	1.4312	-0.5594
39500	1.1313	1.3656	-0.4031
40000	0.6344	1.4594	-0.4625
40500	0.9469	1.2906	-0.5219
41000	0.6875	1.175	-0.1344
41500	-0.0031	1.1594	-0.5344
42000	-0.75	0.8625	-0.55
42500	-1.8844	0.6656	-0.3375
43000	-2.2531	0.3812	-0.3781
43500	-2.2375	-0.0625	-0.4688
44000	-2.5281	-0.2438	-0.5469
44500	-2.4438	-0.6375	-0.1281
45000	-2.0375	-0.9906	-0.4406
45500	-2.2031	-1.1	-0.5188
46000	-1.2469	-1.4969	-0.1531
46500	0.2625	-1.6063	-0.4125
47000	0.2219	-1.7063	-0.525
47500	0.25	-1.6969	-0.4531
48000	0.5906	-1.6875	-0.3187
48500	0.9719	-1.7125	-0.4656
49000	1.3313	-1.6531	-0.6313
49500	1.0094	-1.4719	-0.1469
50000	0.5313	-1.4563	-0.5031
50500	0.3438	-1.2563	-0.5437
51000	-0.1469	-1.2156	-0.425
51500	-0.4531	-1.1438	-0.5563
52000	-0.1156	-0.8969	-0.5938
52500	-0.6813	-0.9187	-0.6438
53000	-0.9594	-0.6906	-0.2813
53500	-0.9906	-0.6938	-0.6219
54000	-1.4312	-0.7188	-0.7937
54500	-1.3594	-0.6594	-0.4125
55000	-0.8781	-0.7531	-0.6656
55500	-0.9844	-0.7312	-0.7094
56000	-1.1531	-0.7125	-0.7
56500	-0.6281	-0.7031	-0.6594
57000	0.6969	-0.4313	-0.7625
57500	1.7437	-0.2688	-0.7844
58000	1.5469	-0.1406	-0.2656
58500	1.0125	0.2	-0.7125
59000	1.4406	0.1187	-0.8656
59500	1.6656	0.1125	-0.5781
60000	1.8344	0.2969	-0.5781
60500	2.1938	0.2719	-0.5844
61000	1.5281	0.5906	-0.6219
61500	1.1656	0.6813	-0.3344
62000	1.325	0.6062	-0.4938
62500	0.8969	0.8406	-0.5031
63000	0.5594	0.7125	-0.0188
63500	0.0375	0.8281	-0.3469
64000	-0.4656	0.9812	-0.425
64500	0.3344	1	-0.2813
65000	0.0813	1.1187	-0.1281
65500	-0.1688	1.0813	-0.2344
66000	0.1094	1.0063	-0.2906
66500	-1.2563	0.9875	0.2094
67000	-1.5688	0.6188	-0.1594
67500	-1.6313	0.4406	-0.2125
68000	-2.5656	0.1469	0.1
68500	-2.8344	-0.3094	-0.0719
69000	-2.8375	-0.4656	-0.0813
69500	-2.2344	-0.8125	-0.1219
70000	-1.1781	-1.0344	0.275
70500	-0.9875	-1.3188	-0.0031
71000	-0.6813	-1.6031	-0.2
71500	0.1781	-1.7063	0.3031
72000	0.6031	-1.8969	-0.0219
72500	1.9844	-1.8687	0.0188
73000	3.1625	-1.7063	0.1313
73500	2.4156	-1.5094	0.05
74000	2.5469	-1.1094	0.0063
74500	3.3406	-0.8156	-0.0625
75000	3.8125	-0.3906	0.575
75500	4.2344	0.2313	0.1781
76000	3.4625	0.5469	0.0281
76500	2.7469	1.0625	0.3
77000	3.2969	1.5031	0.2656
77500	3.6219	1.8438	0.2938
78000	3.4906	2.425	0.3063
78500	3.1063	2.7406	0.5938
79000	2.3438	3.1313	0.2906
79500	2.4813	3.5156	0.3812
80000	3.0719	3.6719	0.8375
80500	2.2031	3.9969	0.55
81000	1.5156	4.1813	0.5031
81500	1.4344	4.1719	0.5156
82000	1.5469	4.3406	0.625
82500	1.425	4.3187	0.6625
83000	0.875	4.1312	0.5969
83500	0.2469	4.1656	1.0313
84000	0.3563	3.8406	0.525
84500	0.1531	3.6188	0.5906
85000	-0.1875	3.2719	0.9125
85500	-0.4188	2.8844	0.6781
86000	-1.5938	2.4875	0.6031
86500	-2.1219	1.8906	0.5563
87000	-1.7094	1.4969	0.8719
87500	-2.3656	0.9969	0.7125
88000	-2.4406	0.4219	0.6156
88500	-1.9937	-0.0063	0.9844
89000	-2.4969	-0.4938	0.6062
89500	-2.4438	-1.0531	0.5625
90000	-2.4344	-1.3906	0.7344
90500	-2.3625	-1.8625	0.6906
91000	-1.475	-2.0187	0.6062
91500	-1.0938	-2.1313	0.4844
92000	-1.0438	-2.3	0.9656
92500	-0.7344	-2.4281	0.525
93000	-1.7813	-2.6781	0.5063
93500	-2.7031	-3.075	0.65
94000	-2.9813	-3.3969	0.4281
94500	-4.0531	-3.8125	0.3656
95000	-4.1281	-3.9875	0.3125
95500	-4.3156	-4.3375	0.5313
96000	-4.8344	-4.5406	0.2
96500	-4.6844	-4.7313	0.0656
97000	-3.9375	-5.0188	0.3812
97500	-2.8531	-5.1031	0.1094
98000	-0.8094	-5.0094	-0.0906
98500	-0.3594	-5.0281	-0.0938
99000	-0.0531	-4.7219	-0.1406
99500	1.0625	-4.6719	-0.2469
100000	1.7969	-4.4188	-0.4094
100500	3.3844	-3.9031	0.0906
101000	4.4531	-3.4562	-0.4188
101500	4.1531	-2.6406	-0.5281
102000	4.2313	-2.0313	-0.2656
102500	4.5375	-1.5719	-0.4344
103000	4.6844	-0.6969	-0.4625
103500	4.4563	-0.1719	-0.6406
104000	3.3563	0.5563	-0.3563
104500	2.5344	1.1844	-0.5094
105000	2.7313	1.7063	-0.6094
105500	2.4562	2.3688	-0.1469
106000	1.7125	2.7281	-0.5375
106500	0.9313	3.0594	-0.6344
107000	-0.1063	3.4688	-0.4656
107500	0.3281	3.6844	-0.3094
108000	0.9187	3.9313	-0.4531
108500	0.0094	4.0594	-0.5344
109000	-1.2063	4.05	-0.0313
109500	-1.5969	4.0125	-0.3469
110000	-1.3656	3.6938	-0.3313
110500	-0.4125	3.4656	-0.0437
111000	-0.7531	3.1156	-0.2844
111500	-2.0531	2.6469	-0.3
112000	-2.2094	2.2094	-0.325
112500	-1.8719	1.4875	0.0594
113000	-1.8406	0.825	-0.1437
113500	-1.6469	0.2594	-0.2188
114000	-2.4875	-0.2594	0.1844
114500	-1.8969	-0.6406	-0.1063
115000	0.2875	-0.9438	-0.0094
115500	1.6531	-1.2281	0.0813
116000	2.9281	-1.2188	0.075
116500	3.5563	-1.1187	0.0125
117000	4.5875	-1.0344	0.0281
117500	5.8	-0.6375	0.5437
118000	5.5719	-0.5781	0.1313
118500	4.6156	-0.2156	-0.0063
119000	3.8	0.0719	0.3469
119500	2.3219	0.2062	0.2656
120000	1.9031	0.6656	0.3125
120500	1.5906	0.975	0.2656
121000	0.8344	1.1938	0.4813
121500	0.4719	1.5406	0.2875
122000	0.5406	1.75	0.2469
122500	0.025	1.9781	0.6719
123000	-0.0906	2.0656	0.275
123500	-0.175	1.9875	0.1813
124000	-0.7906	2.05	0.2125
124500	-1.1375	1.8344	0.2313
125000	-1.7875	1.7406	0.1625
125500	-2.2281	1.625	-0.0031
126000	-2.225	1.2563	0.4094
126500	-2.8438	1.1656	-0.0844
127000	-2.6094	0.7781	-0.1219
127500	-2.1656	0.2719	0.1625
128000	-1.8844	0.0219	-0.1
128500	-0.8844	-0.5	-0.2344
129000	-0.6813	-0.7188	-0.3531
129500	-0.8125	-1.1563	0
130000	-1.1531	-1.5688	-0.2531
130500	-1.2938	-1.8	-0.3969
131000	-1.3375	-2.2219	-0.0844
131500	-1.1563	-2.3312	-0.3219
132000	-1.0719	-2.4	-0.2813
132500	-0.9063	-2.4219	-0.2375
133000	-0.1344	-2.3688	-0.2813
133500	0.05	-2.3719	-0.3
134000	0.3563	-2.2563	-0.4094
134500	0.9406	-2.1125	0.2031
135000	0.6094	-2.1094	-0.125
135500	0.5938	-1.8344	-0.2281
136000	0.3781	-1.8656	0.0781
136500	-0.3594	-1.775	-0.0844
137000	-0.7781	-1.5938	-0.0688
137500	-0.9563	-1.5188	-0.0719
138000	-1.0219	-1.3656	0.2813
138500	-0.6406	-1.2906	-0.0031
139000	-0.7281	-1.2156	-0.1156
139500	-1.2344	-1.0531	0.375
140000	-1.5219	-1.1406	0.0875
140500	-1.9563	-1.1156	-0.0094
141000	-1.5063	-1.1906	-0.0281
141500	-1.1031	-1.1781	0.0594
142000	-2.3563	-1.1719	-0.0781
142500	-3.4031	-1.0406	-0.1656
143000	-3.5406	-1.3781	0.25
143500	-3.4562	-1.5031	-0.2
144000	-3.1469	-1.7688	-0.2875
144500	-3.8594	-2.0219	-0.0969
145000	-4.2813	-2.2	-0.2531
145500	-3.4406	-2.5688	-0.3219
146000	-2.6719	-2.675	-0.4031
146500	-1.9156	-2.9562	-0.1969
147000	-1.2313	-3.1094	-0.3938
147500	-1.2719	-2.9531	-0.4656
148000	-0.3969	-3.025	-0.0844
148500	0.9219	-2.7813	-0.5406
149000	1.25	-2.5812	-0.5281
149500	1.5469	-2.3719	-0.4156
150000	2.0906	-1.9188	-0.3281
150500	1.9063	-1.6406	-0.4188
151000	1.625	-1.225	-0.6062
151500	1.6219	-0.7844	0.0156
152000	1.975	-0.4875	-0.3531
152500	2.5656	0.1281	-0.3781
153000	2.2563	0.575	-0.15
153500	1.3719	0.8906	-0.4125
154000	1.1313	1.3625	-0.3844
154500	1.2563	1.4156	-0.3406
155000	1.9031	1.7219	-0.0125
155500	1.7906	1.975	-0.275
156000	0.3844	2.1	-0.3469
156500	0.2969	2.4063	-0.0063
157000	1.3469	2.4031	-0.2406
157500	1.9281	2.6031	-0.2969
158000	1.7969	2.8188	-0.2781
158500	1.0562	2.7687	-0.2938
159000	0.4	2.8188	-0.3844
159500	0.725	2.7406	-0.4375
160000	0.1594	2.5313	0.0906
160500	-0.4375	2.6094	-0.3031
161000	-0.3969	2.4156	-0.4375
161500	-0.6156	2.2344	-0.1406
162000	0.2125	2.1031	-0.2813
162500	0.3156	1.7656	-0.2969
163000	-0.1906	1.6531	-0.4969
163500	0.6313	1.4563	-0.1938
164000	1.2406	1.1906	-0.3406
164500	1.2406	1.0562	-0.3781
165000	0.7625	0.7969	0.05
165500	-0.0781	0.6813	-0.35
166000	-0.0344	0.4906	-0.375
166500	0.6	0.3563	-0.2281
167000	0.4719	0.4469	-0.1344
167500	-0.3063	0.2844	-0.1813
168000	-0.8813	0.1625	-0.3156
168500	-0.9938	0.1437	0.15
169000	-0.1094	-0.0781	-0.1875
169500	0.0344	-0.1437	-0.1656
170000	-1.15	-0.3094	0.0656
170500	-1.3531	-0.5344	-0.1
171000	-0.9844	-0.6281	-0.2031
171500	-0.9969	-0.825	-0.2031
172000	-0.4313	-0.9406	0.1656
172500	0.025	-0.9031	-0.05
173000	0.0031	-1.075	-0.2156
173500	-0.0125	-1.0031	0.0938
174000	-0.1844	-1.1906	-0.1781
174500	0.2719	-1.2875	-0.1656
175000	1.6406	-1.1344	-0.0625
175500	1.5594	-1.2156	-0.1906
176000	1.05	-0.9563	-0.2562
176500	0.9375	-0.7344	-0.2562
177000	1.4063	-0.6344	0.2625
177500	2.8219	-0.2281	-0.1813
178000	3.025	0.0781	-0.3063
178500	2.3563	0.4125	-0.0188
179000	1.9188	0.7281	-0.1594
179500	2.2188	0.7219	-0.1313
180000	2.4	1.0562	-0.2188
180500	2.0469	1.2	0.0531
181000	0.5969	1.3	-0.1594
181500	-0.4375	1.4375	-0.2469
182000	-0.5969	1.2969	0.2938
182500	-1.5938	1.3219	-0.1156
183000	-2.1437	1.2406	-0.1281
183500	-2.6469	0.9906	-0.0875
184000	-2.8875	0.9156	0.0719
184500	-2.2062	0.6938	-0.0281
185000	-2.1219	0.375	-0.1063
185500	-2.2938	0.3187	0.3375
186000	-1.6063	-0.2156	-0.0219
186500	-0.6969	-0.2781	-0.0531
187000	-0.2094	-0.5875	0.225
187500	-0.1156	-0.8625	0.0437
188000	-0.5281	-0.9969	-0.0813
188500	-0.1406	-1.2906	-0.1031
189000	0.7719	-1.5063	0.2938
189500	-0.0031	-1.5875	0.0063
190000	-0.5844	-1.8281	-0.0063
190500	-0.7	-1.9375	0.4406
191000	-0.5344	-2.1156	0.0375
191500	0.2219	-2.1469	0.1125
192000	0.3563	-1.9344	0.225
192500	0.0656	-1.8719	0.2188
193000	0.2938	-1.6094	0.1281
193500	0.6281	-1.4406	0.0875
194000	1.1406	-1.1125	0.5938
194500	1.5375	-0.7563	0.2156
195000	0.9438	-0.6031	0.1656
195500	0.1844	-0.4031	0.3125
196000	-0.5719	-0.1906	0.1125
196500	-1.0594	-0.2562	0.2313
197000	-0.5281	-0.0844	0.1594
197500	0.3812	0.1	0.4313
198000	0.6344	0.2625	0.0375
198500	0.5969	0.7031	0.025
199000	1.2188	0.6906	0.4563
199500	2.2594	0.8344	0.1969
200000	2.4	0.9531	0
200500	1.3469	0.9688	0.0219
201000	0.2313	1.1187	0.0469
201500	0.1594	1.0969	0.0063
202000	0.8688	1.1406	-0.0437
202500	1.1281	1.4344	0.3875
203000	0.9719	1.5094	-0.0469
203500	0.1969	1.6594	-0.1625
204000	0.4219	1.65	0.0719
204500	1.0688	1.4719	-0.025
205000	-0.4188	1.3969	-0.1656
205500	-1.3344	1.1063	-0.2562
206000	-1.4031	1.0063	0.0531
206500	-0.7813	0.9	-0.1875
207000	-0.1938	0.5344	-0.225
207500	-1.1688	0.5688	0.1656
208000	-1.1594	0.3219	-0.1594
208500	0.2313	0.2719	-0.2469
209000	1.7219	0.3938	-0.0906
209500	2.4281	0.325	0.0938
210000	2.6781	0.5875	-0.2031
210500	2.1375	0.7156	-0.2562
211000	2.6719	0.8719	0.2969
211500	2.7219	1.0781	-0.0656
212000	1.0344	1.0781	-0.1375
212500	-0.5344	1.0813	0.0344
213000	-1.9719	1.0156	-0.1281
213500	-2.75	0.6094	-0.0938
214000	-2.8406	0.575	-0.1094
214500	-3.9	0.2469	0.1813
215000	-4.4094	-0.2625	-0.0875
215500	-3.7906	-0.5375	-0.2344
216000	-3.7438	-1.0188	0.1313
216500	-3.0531	-1.3844	-0.1594
217000	-2.5313	-1.7188	-0.1063
217500	-2.3875	-2.0313	-0.1813
218000	-1.0188	-2.1625	-0.1906
218500	0.7813	-2.2531	-0.2938
219000	1.4625	-2.1375	-0.2844
219500	2.0563	-1.9781	0.1437
220000	2.1094	-1.9344	-0.25
220500	2.3906	-1.6688	-0.4406
221000	2.4438	-1.5344	-0.2156
221500	0.7906	-1.4531	-0.2594
222000	-0.0875	-1.1063	-0.3125
222500	-0.1906	-0.9969	-0.4437
223000	-0.7969	-0.8531	-0.2031
223500	-0.7156	-0.5563	-0.3344
224000	-1.1563	-0.4625	-0.4938
224500	-1.7938	-0.1281	-0.0063
225000	-0.5437	-0.075	-0.3812
225500	0.6062	0.1156	-0.4688
226000	1.0906	0.4406	-0.3906
226500	1.0094	0.5563	-0.3094
227000	1.3469	0.7563	-0.3781
227500	2.6188	1.1156	-0.5
228000	2.8781	1.3125	0.0063
228500	2.3969	1.7688	-0.3844
229000	2.6875	1.9969	-0.2938
229500	3.1313	2.3063	-0.1281
230000	2.9344	2.3813	-0.2656
230500	1.8906	2.3188	-0.4
231000	0.6219	2.2938	-0.3344
231500	-0.4719	2.1625	0.1094
232000	-0.5031	1.8719	-0.1344
232500	-0.0938	1.85	-0.3063
233000	-0.7594	1.65	0.1781
233500	-1.2563	1.5063	-0.0875
234000	-1.1969	1.425	-0.1094
234500	-0.7344	1.0906	-0.0469
235000	-0.3344	1	-0.0344
235500	-1.0094	0.7906	-0.0813
236000	-1.0594	0.5594	-0.1875
236500	-0.8094	0.2844	0.425
237000	-1.3188	-0.0344	-0.025
237500	-1.5469	-0.1594	-0.1187
238000	-1.875	-0.5125	0.1344
238500	-2.2094	-0.8875	-0.0031
239000	-1.7375	-0.9875	0.0375
239500	-1.4031	-1.2844	0.025
240000	-1.5188	-1.4469	0.3063
240500	-1.5	-1.6438	-0.0125
241000	-1.3062	-1.8938	-0.1031
241500	-0.7031	-1.8531	0.3625
242000	-0.4813	-2.1063	0.0188
242500	-1.7031	-2.2094	-0.1563
243000	-2.1906	-2.1938	-0.1187
243500	-2	-2.5063	-0.0094
244000	-2.2531	-2.5094	-0.1063
244500	-2.1313	-2.4562	-0.2688
245000	-2.2844	-2.4938	0.1313
245500	-2.8031	-2.2656	-0.2562
246000	-2.4625	-2.4406	-0.3156
246500	-2.0781	-2.5031	-0.1375
247000	-1.8531	-2.4094	-0.3688
247500	-1.3031	-2.5313	-0.5188
248000	-1.2031	-2.5094	-0.6469
248500	-0.8031	-2.4844	-0.3531
249000	-0.5625	-2.5969	-0.6438
249500	-1.0531	-2.375	-0.7937
250000	-0.7563	-2.5688	-0.4688
250500	-0.0625	-2.4469	-0.9
251000	-0.5906	-2.2156	-0.9844
251500	-0.8531	-2.1781	-0.8125
252000	-0.4969	-1.8469	-0.9406
252500	0.325	-1.6781	-1.0281
253000	0.9781	-1.4156	-1.1969
253500	0.9406	-1.0125	-0.6875
254000	0.8562	-0.8688	-1.025
254500	1.4438	-0.3969	-1.0938
255000	2.1719	-0.1094	-0.8844
255500	3.1469	0.2094	-1.0625
256000	3	0.6813	-1.1031
256500	1.7437	0.9156	-1.0844
257000	1.6656	1.2594	-0.8313
257500	2.1969	1.5406	-1.05
258000	1.9906	1.7469	-1.0938
258500	1.7563	2.1656	-0.5437
259000	1.3969	2.4	-0.7906
259500	1.3313	2.6094	-0.8813
260000	1.2594	2.725	-0.6969
260500	0.6906	2.6437	-0.75
261000	-0.0031	2.6844	-0.7469
261500	-0.6313	2.6719	-0.7094
262000	-1.7281	2.4313	-0.2062
262500	-1.6656	2.5563	-0.5969
263000	-1.0594	2.3594	-0.6438
263500	-1.2375	2.2125	-0.2813
264000	-0.8469	1.9031	-0.3719
264500	-0.925	1.4594	-0.4719
265000	-1.55	1.1094	-0.5344
265500	-1.55	0.5469	-0.2688
266000	-0.5781	0.0625	-0.2969
266500	0.2406	-0.2031	-0.3594
267000	0.2906	-0.3719	-0.0031
267500	0.3406	-0.4719	-0.2906
268000	0.7406	-0.6156	-0.3344
268500	1.5625	-0.7188	-0.1625
269000	2.3656	-0.675	-0.0625
269500	2.4813	-0.6406	-0.1844
270000	2.4594	-0.4781	-0.2813
270500	1.2594	-0.3094	0.2188
271000	1.2594	-0.2813	0.0219
271500	2.8719	0.0688	-0.0313
272000	2.7875	0.3219	0.2313
272500	2.775	0.6656	0.0063
273000	2.5031	1.2219	-0.0031
273500	2.3719	1.4	0.0594
274000	3.0719	1.6375	0.3688
274500	2.4781	1.8687	0.0563
275000	0.9688	1.9563	-0.0094
275500	-0.3875	2.0563	0.45
276000	-1.4906	1.9594	0.125
276500	-1.0781	1.7844	0.1063
277000	-0.9281	1.6531	0.1187
277500	-2.875	1.4094	0.0437
278000	-3.5719	1.3438	0.0188
278500	-2.4531	1.025	-0.0406
279000	-1.1938	0.7781	0.4844
279500	-0.175	0.7156	0.0156
280000	-0.3281	0.5156	-0.1688
280500	-0.7594	0.3281	0.1625
281000	0.2719	0.175	0.0063
281500	1.1875	-0.2625	-0.0813
282000	1.5063	-0.3688	-0.1281
282500	1.2406	-0.5344	0.1625
283000	0.5469	-0.5969	-0.1594
283500	1.3438	-0.4938	-0.1719
284000	2.1031	-0.8031	0.3625
284500	1.0844	-0.6938	-0.0094
285000	0.575	-0.5531	-0.0781
285500	0.9844	-0.6125	0.0594
286000	1.6719	-0.3531	0.2062
286500	1.8094	-0.1125	0.1969
287000	1.1938	0.0219	0.0406
287500	1.2813	0.2281	0.4906
288000	1.4844	0.275	0.2
288500	0.7344	0.5188	0.2625
289000	-0.1531	0.5781	0.6031
289500	-0.575	0.6219	0.2938
290000	-0.8406	0.7188	0.3094
290500	-0.1781	0.6594	0.2656
291000	-0.2281	0.6469	0.6188
291500	-1.6063	0.6781	0.3875
292000	-2.4688	0.3406	0.3156
292500	-1.9813	0.1406	0.6844
293000	-1.5688	-0.0719	0.3969
293500	-1.7156	-0.3094	0.4344
294000	-2.0281	-0.3438	0.5188
294500	-2.0094	-0.7	0.4563
295000	-1.3969	-0.8156	0.2344
295500	-1.5	-1.0531	0.2125
296000	-0.9438	-1.2156	0.6844
296500	-0.4781	-1.0406	0.3094
297000	-0.7188	-1.1969	0.2125
297500	0.375	-1.1656	0.3187
298000	0.6344	-1.1812	0.1813
298500	-0.8125	-1.3719	0.1813
299000	-1.2969	-1.4406	0.1719
299500	-0.7344	-1.6375	0.3344
300000	0.5	-1.5875	0.0906
300500	0.9125	-1.4125	0.0406
301000	0.5938	-1.4219	0.4656
301500	0.7344	-1.2063	0.1469
302000	1.3813	-1.0969	0.0188
302500	1.5938	-0.9656	0.0938
303000	1.975	-0.5781	0.1313
303500	2.5	-0.25	0.1656
304000	2.05	0.1969	-0.0031
304500	3.0344	0.6938	0.5063
305000	3.1719	0.9594	0.1031
305500	1.8313	1.2688	0.0125
306000	0.4031	1.4844	0.2625
306500	-0.6344	1.4969	0.1625
307000	-1.5938	1.5688	0.0813
307500	-2.5	1.4125	-0.0813
308000	-3.4531	1.3156	0.1656
308500	-4.3812	1.0719	-0.0094
309000	-4.875	0.5844	-0.1094
309500	-5.3281	0.2906	0.2406
310000	-4.3156	-0.275	-0.1531
310500	-3.4375	-0.7688	-0.2938
311000	-3.0625	-1.0531	-0.2062
311500	-2.0563	-1.5281	-0.2562
312000	-0.6531	-1.8062	-0.3531
312500	0.5875	-1.9563	-0.45
313000	1.5219	-2.0563	0.0219
313500	2.9469	-1.7688	-0.3187
314000	4.3781	-1.5594	-0.4063
314500	5.2781	-1.2594	-0.1281
315000	5.1719	-0.75	-0.3375
315500	4.7875	-0.6281	-0.3719
316000	4.4688	-0.1813	-0.3938
316500	4.1125	0.1344	0.0094
317000	3.8219	0.5	-0.1688
317500	3.0063	1.0906	-0.3
318000	0.9344	1.2656	0.2031
318500	-0.4688	1.4813	-0.0406
319000	-0.7937	1.6406	-0.0406
319500	-1.4094	1.6875	-0.0031
320000	-2.2531	1.8469	0.0906
320500	-2.4844	1.7563	0.0813
321000	-2.0688	1.6844	0.0844
321500	-1.5438	1.6125	0.5531
322000	-1.4563	1.325	0.1094
322500	-1.3031	1.2281	-0.0125
323000	-0.7219	0.9812	0.2844
323500	-0.7281	0.5813	0.1344
324000	-0.1094	0.3938	0.075
324500	0.3375	0.0156	0.0313
325000	-0.9406	-0.2313	0.2594
325500	-1.1812	-0.5281	0.0875
326000	-0.7438	-1.0219	0.0156
326500	-1.0594	-1.1406	0.4406
327000	-1.2563	-1.3656	0.1281
327500	-1.3844	-1.4781	0
328000	-0.4656	-1.4188	0.0625
328500	0.7063	-1.5594	0.1563
329000	0.8281	-1.4594	0.0156
329500	0.8844	-1.2875	-0.1344
330000	0.5719	-1.2719	0.3031
330500	0.05	-1.0813	-0.0031
331000	0.6438	-0.9625	0.0063
331500	1.2531	-0.7844	0.2625
332000	0.3906	-0.5594	0.0563
332500	-0.0437	-0.5688	-0.1
333000	0.4281	-0.375	-0.0094
333500	0.4437	-0.3531	0.3187
334000	0.8469	-0.3438	0.0656
334500	1.2938	-0.0594	-0.0688
335000	1.4594	0.0344	0.4156
335500	1.4063	0.2406	0.0594
336000	0.5375	0.3031	0.1031
336500	-0.0531	0.3094	0.1688
337000	0.0719	0.3656	0.1437
337500	-1.0813	0.4094	0.0031
338000	-1.5531	0.4344	-0.1219
338500	-1.6688	0.4344	0.4313
339000	-3.0156	0.1906	0.0031
339500	-3.5281	-0.0844	-0.15
340000	-3.8438	-0.4625	0.05
340500	-4.3344	-0.9406	-0.1625
341000	-4.4125	-1.2656	-0.1031
341500	-4.5031	-1.8687	-0.1625
342000	-3.4125	-2.0844	0.025
342500	-1.6406	-2.2188	-0.2813
343000	-0.3187	-2.4625	-0.3656
343500	1.5031	-2.3188	0.1719
344000	2.2469	-2.275	-0.2281
344500	2.0656	-2.2375	-0.3688
345000	2.6437	-2.0375	-0.2719
345500	3.7313	-1.9594	-0.1563
346000	3.2094	-1.5969	-0.2313
346500	2.2969	-1.2531	-0.3156
347000	1.1906	-0.9063	0.1563
347500	0.2719	-0.525	-0.1938
348000	-0.1594	-0.3094	-0.1844
348500	-1.1625	-0.1313	0.0656
349000	-1.5438	0.1969	-0.1
349500	-1.5219	0.2031	-0.1094
350000	-1.7188	0.2469	-0.1844
350500	-0.8375	0.15	0.1719
351000	-0.0906	0.1563	0.0437
351500	-0.5281	0.2875	-0.0875
352000	-0.0688	0.1625	0.2969
352500	0.5219	0.1125	-0.1
353000	-0.2406	0.0688	-0.0906
353500	-0.9375	-0.1156	0.1125
354000	-0.9063	-0.1187	0.0188
354500	-0.6781	-0.2938	-0.0656
355000	-0.9125	-0.3812	-0.1813
355500	-2.0656	-0.4469	0.375
356000	-2.5406	-0.6813	0.0156
356500	-1.8719	-0.925	-0.1531
357000	-1.5406	-0.9938	0.1125
357500	-0.8531	-1.1219	-0.1031
358000	-0.3281	-1.0562	-0.1156
358500	-0.9719	-1.1406	-0.1719
359000	-0.2313	-1.2063	0.0969
359500	0.6219	-1.2938	-0.1875
360000	-0.3281	-1.3531	-0.275
360500	-0.3969	-1.2031	0.2313
361000	0.2844	-1.1469	-0.1156
361500	0.9812	-1.0438	-0.2
362000	0.8625	-0.825	-0.0781
362500	-0.1656	-0.8031	-0.1
363000	-0.2062	-0.6938	-0.2094
363500	0.7563	-0.6781	-0.1688
364000	0.5406	-0.5969	0.2781
364500	0.2844	-0.3187	-0.0719
365000	0.4094	-0.2	-0.1906
365500	0.0219	0.0031	0.2062
366000	1.1812	0.2938	-0.0188
366500	2.1594	0.3281	-0.0969
367000	1.9438	0.5938	-0.2313
367500	1.375	0.6156	0.0531
368000	1.2344	0.6594	-0.1187
368500	1.2594	0.8	-0.1781
369000	1.1656	0.7719	0.25
369500	0.7969	0.7688	-0.1469
370000	0.4188	0.8219	-0.1781
370500	0.0969	0.7469	-0.0625
371000	-1.1688	0.8406	-0.0719
371500	-1.0938	0.5656	-0.1563
372000	-0.0875	0.4813	-0.2406
372500	-0.3688	0.6375	0.1594
373000	-0.2094	0.5	-0.1313
373500	0.2969	0.6219	-0.1688
374000	0.9531	0.6687	0.0125
374500	2.0344	0.5594	-0.275
375000	1.5813	0.6406	-0.3063
375500	0.8094	0.5781	-0.2375
376000	0.5938	0.6156	0
376500	0.4156	0.6219	-0.2313
377000	1.4406	0.575	-0.3344
377500	1.9594	0.7469	0.1031
378000	0.7125	0.8688	-0.15
378500	0.3094	0.8438	-0.2313
379000	0.8906	0.9594	-0.1344
379500	0.9031	0.9	-0.1344
380000	0.8969	1.1344	-0.2062
380500	0.5344	1.1563	-0.1719
381000	-0.2625	1.1906	0.2969
381500	-0.5281	1.3156	-0.1219
382000	-0.5531	1.2969	-0.1969
382500	-0.6719	1.3687	0.1187
383000	-0.825	1.4219	0.0031
383500	-1.4531	1.2281	-0.0938
384000	-1.1	1.1219	-0.0437
384500	-0.4375	0.9	0.1031
385000	-1.3656	0.5719	-0.1656
385500	-2.1875	0.3063	-0.1813
386000	-2.3656	-0.2188	0.3031
386500	-2.7	-0.5719	-0.1406
387000	-2.2406	-0.8281	-0.2062
387500	-2.0938	-1.2063	-0.0656
388000	-2.3719	-1.3406	-0.1063
388500	-2.4156	-1.7313	-0.2031
389000	-1.9844	-1.95	-0.35
389500	-1.3531	-2.0375	0.0437
390000	-0.2875	-2.4313	-0.2438
390500	-0.2969	-2.3094	-0.275
391000	0.0781	-2.2438	-0.0469
391500	1.3438	-2.2531	-0.2813
392000	1.9656	-1.9094	-0.3156
392500	2.6656	-1.8313	-0.3625
393000	2.7625	-1.3875	-0.0688
393500	1.625	-1.0719	-0.2313
394000	1.3375	-0.7563	-0.325
394500	2.1219	-0.3531	0.0719
395000	2.5531	-0.0094	-0.2094
395500	1.4188	0.4094	-0.2781
396000	0.0656	0.8313	-0.0906
396500	-0.2281	0.9469	-0.1656
397000	0.5406	1.1812	-0.3125
397500	0.2969	1.2906	-0.3031
398000	-0.4813	1.5094	0.1938
398500	-0.1938	1.8313	-0.1
399000	-0.0719	1.9031	-0.2125
399500	1.0344	2.1906	-0.0219
400000	1.6969	2.2344	-0.0625
400500	0.5156	2.1844	-0.0531
401000	-0.1219	2.1406	-0.1219
401500	0.0969	1.85	0.0313
402000	0.2094	1.6281	-0.1688
402500	0.2156	1.5938	-0.1625
403000	-0.8938	1.3062	0.3563
403500	-1.6375	1.0281	-0.0375
404000	-1.3	0.8938	-0.1469
404500	-1.2781	0.5594	0.0406
405000	-1.2469	0.4125	0.0844
405500	-0.7719	0.1875	0.0656
406000	-0.9875	0.0156	-0.0094
406500	-0.6938	-0.1031	0.4188
407000	-0.0188	-0.3969	-0.0094
407500	-0.0437	-0.3906	-0.0313
408000	0.3938	-0.4125	0.2719
408500	0.9187	-0.4594	0.175
409000	1.6187	-0.2031	0.0188
409500	2.0719	-0.2562	-0.0156
410000	1.175	-0.1281	0.2531
410500	0.8	-0.0313	0.1563
411000	1.0094	-0.0656	0.0031
411500	0.775	0.0844	0.5094
412000	0.8875	0.1469	0.1437
412500	1.3219	0.2094	0.1906
413000	0.5	0.3375	0.2469
413500	0.3	0.4125	0.2844
414000	1.3781	0.5437	0.1437
414500	1.8125	0.725	0.0125
415000	2.55	0.9344	0.5844
415500	2.9688	1.3656	0.2844
416000	3.3781	1.6969	0.1594
416500	3.4438	1.9156	0.3063
417000	2.4	2.2406	0.1
417500	2.4313	2.175	0.0688
418000	2.2344	2.2844	0.1063
418500	0.9375	2.2	0.3219
419000	0	2.1406	0.1313
419500	-0.5437	2.0688	-0.0719
420000	-0.6094	1.8438	0.4594
420500	0.1063	1.8219	0.2313
421000	0.6094	1.8313	0.15
421500	0.3187	1.7688	0.0938
422000	-0.2094	1.6281	0.0813
422500	-0.275	1.4656	0.0938
423000	0.1156	1.3062	0.0156
423500	-0.1656	1.2156	0.5094
424000	-1.1656	1.025	0.025
424500	-1.6844	0.9281	-0.0719
425000	-1.8531	0.7219	0.2313
425500	-3.0031	0.2688	0.1469
426000	-3.9813	-0.1281	-0.0375
426500	-4.6781	-0.5875	-0.175
427000	-5.5375	-1.2156	0.0875
427500	-6.15	-1.6688	-0.1688
428000	-6.2094	-2.3594	-0.225
428500	-6.4375	-2.9313	0.1875
429000	-6.2875	-3.5313	-0.2531
429500	-6.0531	-4.0531	-0.3812
430000	-5.4281	-4.5062	-0.3719
430500	-4.4531	-5.05	-0.3938
431000	-3.6625	-5.4281	-0.4594
431500	-2.9375	-5.5781	-0.6438
432000	-1.5969	-5.8938	-0.2906
432500	-1.5875	-5.8313	-0.7344
433000	-0.825	-5.8875	-0.7688
433500	0.0813	-5.8688	-0.5719
434000	0.3563	-5.5531	-0.875
434500	0.6375	-5.4906	-0.9531
435000	1.2219	-5.2313	-1.0188
435500	2.1063	-4.8875	-0.7219
436000	2.7313	-4.4437	-0.9406
436500	3.2656	-3.7156	-1.1313
437000	3.8188	-3.1156	-0.7125
437500	5.1063	-2.3125	-0.9688
438000	5.3031	-1.4875	-1.0625
438500	4.7469	-0.6875	-0.9625
439000	4.9844	0.1813	-1.0781
439500	3.7313	0.9438	-1.0906
440000	3.2344	1.5969	-1.1594
440500	3.1813	2.3688	-0.5656
441000	1.5969	2.8844	-0.875
441500	1.5625	3.6563	-0.9625
442000	1.9719	4.2344	-0.7188
442500	2.4469	4.6531	-0.8156
443000	2.3594	5.1094	-0.8063
443500	0.7719	5.2125	-0.8375
444000	0.125	5.2156	-0.6938
444500	-0.2688	5.1594	-0.8281
445000	-2.2	4.65	-0.8063
445500	-2.9281	4.4813	-0.2594
446000	-2.9688	4.0281	-0.6469
446500	-3.5281	3.5156	-0.7063
447000	-3.3188	3.0313	-0.4719
447500	-3.5094	2.2906	-0.5188
448000	-4.2281	1.7	-0.5156
448500	-3.5469	0.9313	-0.575
449000	-3.2219	0.1	-0.1313
449500	-2.6313	-0.4719	-0.3719
450000	-2.0906	-1.0031	-0.3563
450500	-2.0531	-1.4406	-0.0813
451000	-0.4281	-1.6594	-0.25
451500	1.0094	-2.0531	-0.3344
452000	1.4469	-2.0844	-0.2531
452500	2.0844	-2.225	0.0969
453000	2.6437	-2.2781	-0.0938
453500	2.2188	-2.2438	-0.1187
454000	1.8687	-2.2781	0.2906
454500	1.4906	-2.1156	0.0219
455000	1.2313	-1.8938	0.0656
455500	0.8906	-1.7594	0.175
456000	0.5469	-1.4406	0.075
456500	-0.4875	-1.1625	-0.0031
457000	-0.375	-0.9344	-0.0281
457500	-0.3187	-0.6031	0.3938
458000	0.2438	-0.35	0.0437
458500	0.5063	-0.0656	-0.0781
459000	-0.9094	0.1125	0.0844
459500	-1.1438	0.1844	-0.1719
460000	-0.9281	0.2375	-0.2688
460500	-1.9844	0.0406	-0.3219
461000	-2.65	0.0281	-0.225
461500	-3.1781	0.0188	-0.4813
462000	-2.7156	-0.2219	-0.625
462500	-1.5844	-0.2469	-0.2188
463000	-2.1156	-0.4906	-0.5469
463500	-2.5438	-0.8219	-0.8063
464000	-2.6281	-1.1125	-0.7719
464500	-2.2813	-1.5188	-0.7969
465000	-0.8313	-1.7031	-0.75
465500	0.4719	-1.6938	-0.8531
466000	0.675	-1.7156	-0.425
466500	2.0187	-1.3031	-0.8844
467000	3.4	-1.0688	-0.8281
467500	4.2219	-0.7406	-0.4375
468000	4.5281	-0.0844	-0.6188
468500	4.6563	0.3063	-0.625
469000	4.4188	0.7875	-0.6313
469500	3.925	1.0938	-0.3156
470000	2.2031	1.2594	-0.3406
470500	0.1469	1.5531	-0.4094
471000	-1.0125	1.4813	0.125
471500	-2.4813	1.4531	-0.2438
472000	-3.3656	1.425	-0.1906
472500	-4.1625	1.1781	0.0375
473000	-5.15	0.9656	0.1219
473500	-4.8656	0.6281	0.0406
474000	-3.1156	0.2156	-0.0813
474500	-2.7094	-0.1969	0.4594
475000	-2.4063	-0.7531	0.1219
475500	-2.0313	-1.0531	0.0969
476000	-1.0719	-1.4281	0.4344
476500	0.9187	-1.7531	0.1844
477000	1.4594	-1.8031	0.1563
477500	1.6469	-1.9406	0.2438
478000	2.225	-1.8938	0.525
478500	2.0219	-1.7531	0.2438
479000	1.7281	-1.9156	0.1406
479500	1.2344	-1.8156	0.5688
480000	-0.1375	-1.5875	0.2906
480500	-0.7594	-1.6187	0.275
481000	-0.8469	-1.4281	0.3281
481500	-1.825	-1.3687	0.2125
482000	-2.2563	-1.2156	0.1969
482500	-2.7844	-1.0625	0.1469
483000	-2.3375	-1.0844	0.5938
483500	-1.4094	-0.8562	0.2375
484000	-1.1281	-0.6906	0.0719
484500	-0.0375	-0.2875	0.375
485000	1.3594	0.175	0.2125
485500	2.3	0.4281	0.2438
486000	3.3406	0.9219	0.1656
486500	3.9125	1.1688	0.2813
487000	3.1875	1.4	0.1031
487500	2.5625	1.7219	0.0719
488000	2.0438	1.7875	0.5688
488500	1.4563	1.9656	0.1313
489000	0.8063	2.0938	0.0344
489500	-0.0625	2.0688	0.2469
490000	-0.8156	2.2625	0.2531
490500	-0.7312	2.2375	0.225
491000	-0.5969	2.2125	0.0813
491500	0.1781	2.2531	0.4656
492000	0.325	2.1469	0.1906
492500	-0.15	2.0406	0.1656
493000	0.3406	1.9937	0.4531
493500	1.5438	1.8375	0.1875
494000	2.1344	1.8563	0.1063
494500	2.5812	1.8781	0.1406
495000	2.9594	1.9312	0.3719
495500	3.1344	2.0812	0.175
496000	3.1844	1.9906	0.1406
496500	2.8719	2.0938	0.5094
497000	2.3937	2.1469	0.2375
497500	2.0531	2.0688	0.2875
498000	1.7313	2.225	0.4875
498500	1.0719	2.1375	0.3875
499000	1.3156	2.2094	0.375
499500	0.4875	2.3469	0.3063
500000	-0.0781	2.1063	0.8719
500500	-0.5469	2.15	0.5563
501000	-1.2156	2.1031	0.3812
501500	-1.0844	1.9188	0.6531
502000	-1.3	1.8438	0.5031
502500	-2.2656	1.4438	0.4719
503000	-2.8594	1.2	0.4313
503500	-3.2188	0.7406	0.675
504000	-2.6563	0.2094	0.4094
504500	-1.95	-0.1594	0.3344
505000	-2.1188	-0.7	0.825
505500	-1.9688	-1.0844	0.4063
506000	-1.1531	-1.3594	0.3781
506500	-0.9594	-1.9156	0.4094
507000	-0.2844	-2.1656	0.3781
507500	0.5094	-2.3656	0.4
508000	0.3187	-2.4938	0.2656
508500	0.3812	-2.4188	0.6625
509000	0.3469	-2.6594	0.1844
509500	-0.1719	-2.6188	0.1469
510000	-0.1938	-2.6281	0.5125
510500	-0.1688	-2.6281	0.3344
511000	-0.0969	-2.2969	0.1219
511500	0.6781	-2.1563	0.0906
512000	0.8531	-1.9094	0.3906
512500	1.175	-1.5313	0.1563
513000	1.6688	-1.4031	0.0469
513500	0.7688	-1.1031	0.4906
514000	0.3875	-0.8969	0.0719
514500	0.3594	-0.8125	0.0781
515000	-0.1938	-0.4313	0.2219
515500	0.0281	-0.3063	0.1563
516000	-0.1938	-0.0031	0.025
516500	-0.3406	0.3	-0.0563
517000	-0.1875	0.3219	0.3344
517500	-0.425	0.5406	0.0437
518000	-0.1781	0.7125	-0.0437
518500	0.4688	0.8406	0.2625
519000	0.5688	1.0844	-0.075
519500	0.3688	1.0438	-0.1625
520000	0.3781	1.0781	-0.1281
520500	-0.2344	1.0344	0.15
521000	-0.4188	0.8719	-0.15
521500	0.2438	0.8313	-0.2875
522000	-0.0406	0.6469	0.2688
522500	0.3969	0.625	-0.0781
523000	0.6875	0.5313	-0.1406
523500	0.1719	0.4031	-0.1781
