# Supplementary material for: A Method for Analyzing Hand‐Transmitted Vibration Characteristics in the Hand‐Arm Parts When Operating the Portable Pneumatic Extinguisher
Source: Hindawi journal article supplement (doi:10.1155/2019/9402539), 2019-01-01
Supplement: f1 [file 9402539.f1.zip › 9402539.f1/Supplementary Material 3.CSV]

RA1000	ID= 1090063
Data No.= 60
Memory
Data num= 1049
Sampling= 500 us
Step= 1
CH.1-A=	FFT	ON	100m/s^2	OFF	OFF	DC
CH.2-A=	FFT	ON	100m/s^2	OFF	OFF	DC
CH.3-A=	FFT	ON	100m/s^2	OFF	OFF	DC
Time(us)	CH1-A(m/s^2)	CH2-A(m/s^2)	CH3-A(m/s^2)
-500	0.3625	0.1437	0.7563
0	1.2281	0.3031	0.5437			2.057738866	1.513840117	1.147218912
500	0.6813	0.6406	0.5313
1000	0.8531	0.7	0.9094
1500	1.7406	0.7688	0.6188
2000	1.5031	0.9594	0.5188
2500	1.2313	0.9281	0.6594
3000	1.6969	0.8281	0.7031
3500	2.3281	1.025	0.6813
4000	2.9156	0.9156	0.5875
4500	2.9125	0.7719	1.0188
5000	3.0438	0.7	0.5313
5500	3.5969	0.3625	0.4719
6000	3.8406	0.1219	0.7531
6500	4.4063	-0.2219	0.4938
7000	4.5344	-0.75	0.4688
7500	3.2531	-1.0188	0.3063
8000	2.4906	-1.4688	0.3844
8500	2.3656	-2.0156	0.2469
9000	0.8094	-2.35	0.1844
9500	-0.3281	-2.8219	0.6969
10000	-0.9094	-3.3281	0.1938
10500	-2.4531	-3.3781	0.0063
11000	-2.2656	-3.5688	0.2844
11500	-1.1281	-3.6281	0.2313
12000	-1.6	-3.4875	0.225
12500	-2.6656	-3.4719	0.125
13000	-2.6156	-3.3531	0.3594
13500	-2.1156	-3.0187	0.2188
14000	-2.1875	-2.8625	0.1031
14500	-2.9844	-2.5406	0.6
15000	-3.7313	-2.1125	0.2813
15500	-3.5781	-1.7281	0.15
16000	-3.4656	-1.0125	0.3187
16500	-2.775	-0.4375	0.1656
17000	-2.1531	0.0219	0.1563
17500	-2.0375	0.6687	0.15
18000	-1.4531	1.1688	0.5031
18500	-0.2875	1.5344	0.0375
19000	-0.025	2.0875	-0.1156
19500	0.8938	2.4125	0.325
20000	2.3906	2.6469	-0.0375
20500	3.3063	2.9531	-0.125
21000	3.4344	2.9063	-0.1313
21500	3.1813	2.7531	-0.2938
22000	3.2781	2.7375	-0.3688
22500	3.2188	2.3156	-0.5156
23000	3.3719	1.9719	-0.0906
23500	3.3094	1.6344	-0.4938
24000	2.2719	1.0969	-0.7219
24500	1.6594	0.6344	-0.5
25000	1.9063	0.3844	-0.7406
25500	2.5031	-0.0656	-0.7094
26000	3.2844	-0.4375	-0.6969
26500	3.3188	-0.8125	-0.6281
27000	1.8656	-1.4125	-0.8344
27500	0.2094	-1.6781	-0.9531
28000	0.3344	-2.0688	-0.4344
28500	0.3469	-2.3719	-0.6531
29000	-0.4469	-2.6031	-0.7531
29500	-1.5188	-2.8188	-0.4313
30000	-2.5406	-2.8063	-0.6344
30500	-2.0344	-2.5688	-0.5844
31000	-0.5375	-2.5281	-0.5406
31500	-0.7906	-2.4625	-0.2
32000	-0.9344	-2.2406	-0.3938
32500	0.3125	-2.15	-0.5375
33000	1.0688	-1.9469	-0.0219
33500	0.3187	-1.7563	-0.3656
34000	-1.1344	-1.7594	-0.3969
34500	-1.7219	-1.5156	-0.1531
35000	-1.3938	-1.2375	-0.275
35500	-1.3875	-1.1094	-0.3313
36000	-1.5281	-0.8063	-0.3656
36500	-1.3188	-0.4813	-0.0031
37000	-1.375	-0.3875	-0.2188
37500	-0.5969	-0.0188	-0.3719
38000	0.5	0.0125	-0.0156
38500	-0.1156	0.0437	-0.4063
39000	-1.0406	0.175	-0.4625
39500	-0.925	0.1844	-0.2469
40000	-1.7281	0.2344	-0.3531
40500	-2.6781	0.3812	-0.5313
41000	-3.5281	0.3969	-0.5969
41500	-4.2375	0.6438	-0.1969
42000	-3.9438	0.9313	-0.5313
42500	-3.0844	1.0844	-0.625
43000	-2.6156	1.2688	-0.1813
43500	-2.5938	1.5406	-0.5375
44000	-2.4344	1.4937	-0.5906
44500	-1.0406	1.6469	-0.5625
45000	-0.4969	1.7313	-0.4031
45500	-1.7969	1.6594	-0.525
46000	-2.4688	1.7469	-0.6062
46500	-2.1	1.8156	-0.1437
47000	-3.1563	1.7125	-0.5344
47500	-4.1375	1.8219	-0.4844
48000	-4.1156	1.825	-0.0906
48500	-4.4406	1.8219	-0.325
49000	-3.7156	2.0594	-0.4344
49500	-2.4344	2.0719	-0.2844
50000	-2.2438	2.1531	-0.0563
50500	-1.9375	2.2938	-0.1938
51000	-1.2813	2.1844	-0.225
51500	-0.6156	2.2438	0.2625
52000	0.3438	2.3656	-0.1281
52500	1.1	2.2062	-0.1313
53000	1.7688	2.2344	0.1594
53500	1.7406	2.225	0.1031
54000	1.1313	1.9781	0.0719
54500	1.3469	1.8969	0.0406
55000	1.6094	1.7406	0.2781
55500	0.475	1.3469	0.0844
56000	0.0063	1.1938	0.1656
56500	0.1688	0.9	0.6656
57000	0.0844	0.7719	0.3594
57500	0.725	0.5688	0.2062
58000	0.9688	0.2438	0.4063
58500	1.0219	0.0625	0.45
59000	1.5031	-0.1281	0.4219
59500	1.8	-0.5437	0.3844
60000	1.7063	-0.9125	0.725
60500	1.6656	-1.1281	0.4469
61000	1.1125	-1.4719	0.4844
61500	0.6344	-1.6563	0.925
62000	1.1281	-1.7344	0.6563
62500	0.2688	-1.9531	0.625
63000	-0.8375	-2.0594	0.6594
63500	-1.3531	-2.1281	0.6938
64000	-1.9156	-2.2188	0.6219
64500	-1.1969	-2.0125	0.6625
65000	-0.5406	-2.0313	1.0938
65500	-0.6344	-1.9125	0.7531
66000	-0.4906	-1.6563	0.6094
66500	-0.6969	-1.5344	0.8813
67000	-0.3313	-1.4813	0.7063
67500	0.3125	-1.4094	0.6906
68000	-0.4781	-1.4438	0.6844
68500	-0.5188	-1.3781	0.7156
69000	0.7375	-1.0938	0.5313
69500	0.8531	-1.0156	0.45
70000	0.3594	-0.9781	0.9125
70500	0.3812	-0.7969	0.4938
71000	0.2313	-0.7	0.2719
71500	0.9219	-0.6531	0.4531
72000	1.6406	-0.5813	0.2656
72500	0.9	-0.7031	0.1969
73000	-0.0875	-0.6625	0.0844
73500	0.125	-0.5625	0.2656
74000	0.6938	-0.6375	-0.1187
74500	0.5031	-0.4469	-0.2594
75000	-0.3938	-0.4656	0.1281
75500	-0.1688	-0.4281	-0.2062
76000	0.6	-0.3688	-0.2844
76500	0.0313	-0.3563	-0.2875
77000	-0.3031	-0.3344	-0.4375
77500	0.0125	-0.1844	-0.5719
78000	-0.2188	-0.1281	-0.6094
78500	-0.0906	-0.0781	-0.2094
79000	-0.0313	0.0375	-0.5688
79500	-0.5281	0.0688	-0.7813
80000	-0.1281	0.1688	-0.4125
80500	0.2719	0.2406	-0.6938
81000	0.15	0.1781	-0.7344
81500	0.3844	0.3187	-0.6125
82000	1.0969	0.3313	-0.6438
82500	1.9813	0.2594	-0.7656
83000	2.2344	0.3625	-0.9281
83500	1.5969	0.2938	-0.4156
84000	2.0438	0.1187	-0.7344
84500	2.6563	0.1313	-0.8
85000	2.1031	0.0781	-0.5281
85500	2.2563	-0.2156	-0.8938
86000	2.7875	-0.2313	-0.8906
86500	2.1125	-0.3094	-0.8156
87000	1.8656	-0.5188	-0.7
87500	1.7031	-0.4938	-0.8562
88000	1.2781	-0.6094	-1.0438
88500	1.6094	-0.6906	-0.4969
89000	1.2656	-0.7031	-0.8531
89500	0.5344	-0.8875	-0.9031
90000	-0.3938	-1.05	-0.6938
90500	-1.3281	-1.0094	-0.8844
91000	-2.3656	-1.2281	-0.8906
91500	-2.8594	-1.2906	-0.95
92000	-3.7469	-1.2063	-0.5938
92500	-3.9906	-1.1781	-0.7312
93000	-3.0688	-0.7438	-0.8469
93500	-2.1938	-0.3688	-0.3656
94000	-1.0031	-0.1	-0.7063
94500	-0.1844	0.3781	-0.6844
95000	0.1781	0.6625	-0.4375
95500	0.9781	0.8656	-0.5094
96000	0.725	1.1406	-0.6219
96500	0.1125	1.175	-0.6813
97000	-0.4594	1.2563	-0.3
97500	-1.2969	1.4688	-0.5094
98000	-0.1813	1.6906	-0.5906
98500	2.0063	1.8656	-0.1313
99000	1.6031	2.0156	-0.6594
99500	0.8063	1.8563	-0.6625
100000	1.9125	1.8062	-0.6031
100500	2.7156	1.65	-0.5594
101000	3.4313	1.2406	-0.6844
101500	3.4938	0.925	-0.7875
102000	1.4094	0.5437	-0.4406
102500	0.2688	0.1156	-0.7438
103000	1.3	-0.0656	-0.7969
103500	1.3656	-0.3531	-0.4063
104000	-0.5281	-0.7813	-0.6625
104500	-2.4281	-0.9781	-0.7969
105000	-2.0125	-1.1906	-0.7312
105500	-0.9656	-1.3313	-0.6969
106000	-1.2406	-1.3219	-0.6031
106500	-1.4125	-1.4438	-0.5938
107000	-0.9406	-1.3813	-0.1906
107500	-0.7281	-1.2219	-0.5344
108000	0.4688	-1.1	-0.5688
108500	1.1906	-1.0219	-0.2031
109000	-0.2469	-0.7188	-0.275
109500	-0.2688	-0.7125	-0.3031
110000	1.2406	-0.5344	-0.3187
110500	1.1031	-0.2031	-0.1844
111000	0.0344	-0.1906	-0.2031
111500	-0.0719	0.1156	-0.2
112000	0.6969	0.3063	0.4063
112500	1.1719	0.2906	-0.0563
113000	1.1781	0.3938	-0.1594
113500	1.3469	0.2406	0.1563
114000	0.7438	0.0469	0.0375
114500	0.8469	-0.0031	0.0219
115000	2.6437	-0.2188	0.05
115500	2.3094	-0.4656	0.275
116000	-0.5281	-0.7406	0.0375
116500	-0.4594	-1.0719	0.0375
117000	1.1094	-1.1594	0.5688
117500	1.2531	-1.1844	0.1656
118000	1.3281	-1.3938	0.0594
118500	0.6906	-1.5906	0.2219
119000	-0.35	-1.5469	0.1688
119500	0.3656	-1.7375	0.2062
120000	0.825	-1.7625	0.1313
120500	-0.5344	-1.8313	0.5125
121000	-1.7188	-1.9969	0.2344
121500	-2.0781	-1.9063	0.1875
122000	-2.1063	-1.7563	0.5875
122500	-2.1094	-1.6688	0.3125
123000	-2.8719	-1.3406	0.3156
123500	-2.8156	-1.1719	0.4375
124000	-2.5938	-0.9719	0.3656
124500	-3.3063	-0.6188	0.2844
125000	-3.0313	-0.4094	0.2031
125500	-2.3094	-0.1781	0.7688
126000	-2.5094	0.3219	0.475
126500	-1.9438	0.5406	0.3313
127000	-1.1875	0.8656	0.5813
127500	-1.8031	1.2656	0.4219
128000	-1.5875	1.4563	0.3531
128500	0.125	1.7781	0.3812
129000	1.2719	2.0406	0.4
129500	1.4188	2.0125	0.2438
130000	0.7594	2.1531	0.1156
130500	0.5125	2.3	0.625
131000	1.0719	2.1875	0.2125
131500	1.1938	2.1469	0.1094
132000	0.6062	2.0563	0.3094
132500	-0.9938	1.7781	0.0875
133000	-1.9156	1.7625	0.0563
133500	-0.8625	1.6844	-0.0063
134000	-0.7344	1.525	0.2719
134500	-1.5188	1.4719	0.1313
135000	-0.5656	1.3469	-0.0906
135500	1.0938	1.3969	0.4219
136000	2.4781	1.3438	0.0656
136500	3.625	1.0188	0.0313
137000	3.0313	0.7312	0.1938
137500	1.8156	0.4969	0.0594
138000	1.8938	0.0813	0.0188
138500	2.0938	-0.1969	-0.1
139000	1.2563	-0.3781	0.2219
139500	-0.2281	-0.8813	0.1063
140000	-0.5938	-0.8313	0.0344
140500	0.8438	-0.7937	0.5063
141000	1.0656	-1.0313	0.0719
141500	-0.4875	-1.1375	-0.0031
142000	-1.3469	-1.3094	0.2688
142500	-1.7188	-1.4594	0.2781
143000	-1.6531	-1.5094	0.1813
143500	-2.625	-1.7844	0.05
144000	-5.1906	-1.7844	0.4531
144500	-5.8187	-1.5031	0.1938
145000	-4.5156	-1.3406	0.2781
145500	-3.7094	-0.9469	0.7
146000	-2.9219	-0.4563	0.3438
146500	-0.8063	-0.2	0.2094
147000	1.0531	0.2719	0.3406
147500	2.4813	0.7469	0.3906
148000	3.4219	0.8469	0.3156
148500	3.3719	1.075	0.1875
149000	3.5938	1.1875	0.5531
149500	2.9188	1.0219	0.0813
150000	1.2938	1.1344	0.0938
150500	-0.0063	1.0531	0.3406
151000	-1.3781	0.8656	0.1375
151500	-1.9688	0.8844	-0.0313
152000	-1.8813	0.8094	-0.1219
152500	-1.7406	0.6281	-0.05
153000	-1.1594	0.6625	-0.1406
153500	0.2938	0.3063	-0.2469
154000	1.2625	0.125	0.2625
154500	2.0969	0.2344	-0.2281
155000	2.7	-0.0844	-0.3969
155500	2.2687	-0.2656	-0.1844
156000	1.9969	-0.2719	-0.2531
156500	2.2219	-0.4594	-0.35
157000	1.8438	-0.6031	-0.4844
157500	0.4938	-0.6156	-0.2219
158000	-1.5813	-0.6875	-0.4625
158500	-1.8938	-0.5906	-0.5156
159000	-1.0406	-0.5531	0.05
159500	-1.2969	-0.525	-0.375
160000	-1.8406	-0.3469	-0.4156
160500	-2.0719	-0.2	-0.2969
161000	-2.0469	-0.1781	-0.3344
161500	-1.3125	0.0188	-0.3344
162000	-0.9531	0.1	-0.3406
162500	-1.7688	-0.0031	0.0563
163000	-1.6563	0.2688	-0.1844
163500	-0.9	0.3875	-0.3063
164000	-0.4406	0.6313	0.1406
164500	-0.2625	0.6	-0.1219
165000	0.225	0.8938	-0.1094
165500	1.9	1.1094	-0.0969
166000	3.5563	1.2281	-0.1531
166500	2.9531	1.1313	-0.1969
167000	1.975	1.1469	-0.1406
167500	2.5313	1.0938	0.1781
168000	2.3406	0.8156	-0.0844
168500	1.9219	0.5875	-0.3156
169000	0.9313	0.3375	0.0063
169500	-1.7969	-0.0094	-0.2094
170000	-1.7656	0.1406	-0.2844
170500	0.2344	-0.0531	-0.1875
171000	0.25	-0.1094	-0.1625
171500	0.0531	-0.1406	-0.1938
172000	0.3688	-0.3406	-0.3031
172500	0.7	-0.5281	0.2594
173000	1.0844	-0.5469	-0.0844
173500	1.1438	-0.8719	-0.1437
174000	1.2813	-0.9375	0.1
174500	1.2938	-1.0031	-0.1969
175000	0.4406	-1.0719	-0.2031
175500	-0.3344	-1.0188	-0.0969
176000	-0.8469	-0.9063	0.025
176500	-1.9438	-0.975	-0.1594
177000	-2.0438	-0.8219	-0.1563
177500	-1.9719	-0.6813	0.3563
178000	-2.4875	-0.7094	0.0813
178500	-2.0531	-0.4156	0.0563
179000	-1.6719	-0.2969	0.3469
179500	-2.2094	-0.1063	0.1906
180000	-1.6563	0.1031	0.1344
180500	-0.4781	0.3187	0.0688
181000	0.5781	0.5469	0.4031
181500	2	0.8594	0.1469
182000	2.5688	0.9438	0.05
182500	2.6656	1.0281	0.5188
183000	3.7125	1.1063	0.0719
183500	3.7219	0.9656	0.0844
184000	3.1437	0.7625	0.2406
184500	1.9	0.5	0.1281
185000	-0.1281	0.0531	-0.0125
185500	-1.5781	-0.1156	-0.1531
186000	-1.9656	-0.2875	0.1938
186500	-2.2219	-0.5719	-0.0188
187000	-3.5438	-0.6563	-0.1031
187500	-3.7875	-0.7312	0.3031
188000	-1.7344	-0.6219	-0.0719
188500	-0.05	-0.4219	-0.15
189000	0.475	-0.4906	-0.0188
189500	-0.1594	-0.625	0.0344
190000	-1.3531	-0.6313	-0.025
190500	-1.8313	-0.5688	-0.0875
191000	-0.9469	-0.5844	0.3469
191500	-0.0219	-0.3094	0.0156
192000	-1.4563	-0.3469	0.0125
192500	-1.6344	-0.0531	0.4281
193000	-0.2375	0.4375	0.1437
193500	0.45	0.6094	0.0781
194000	1.5188	0.7281	0.0563
194500	2.4969	0.8125	0.1563
195000	2.45	0.7031	0.1531
195500	2.775	0.7438	-0.0031
196000	3.3469	0.6625	0.425
196500	2.4656	0.45	0.1187
197000	0.6031	0.3063	-0.0031
197500	-0.2562	0.0813	0.2906
198000	-0.1281	-0.1281	0.2
198500	-0.2875	-0.1969	0.1375
199000	-1.4375	-0.5063	0.0844
199500	-1.9281	-0.6031	0.1313
200000	-1.5313	-0.65	-0.0063
200500	-1.8156	-0.7312	-0.0094
201000	-1.0688	-0.8969	0.5656
201500	-0.3094	-0.6938	0.1125
202000	-0.4437	-0.6594	0.0469
202500	-0.2031	-0.5344	0.3219
203000	-0.1969	-0.2813	0.225
203500	-0.5906	-0.15	0.2813
204000	-0.7281	0.0938	0.2531
204500	-1.2219	0.3625	0.4781
205000	-2.1063	0.3406	0.1719
205500	-2.7906	0.5437	0.1313
206000	-3.0313	0.8031	0.7344
206500	-2.7219	0.925	0.3875
207000	-1.7813	1.1969	0.2531
207500	-1.5438	1.375	0.4813
208000	0.2	1.5031	0.3625
208500	2.0063	1.6906	0.3125
209000	2.4906	1.7781	0.3594
209500	3.825	1.6219	0.6625
210000	4.7	1.4969	0.3156
210500	3.7	1.2094	0.1906
211000	2.8	0.7781	0.575
211500	2.4438	0.5563	0.2906
212000	1.7969	0.2313	0.3031
212500	1.2719	-0.15	0.325
213000	0.1469	-0.2719	0.2344
213500	-0.7344	-0.6813	0.1531
214000	-0.5344	-0.7281	0.0938
214500	-0.3594	-0.9875	0.5844
215000	0.3	-1.2719	0.2781
215500	1.0313	-1.3875	0.1813
216000	0.8938	-1.5188	0.4
216500	1.3281	-1.7594	0.1719
217000	1.3313	-1.7656	0.1094
217500	-0.0531	-1.8031	0.1656
218000	-0.6062	-1.9469	0.2438
218500	-0.8875	-1.9188	0.1625
219000	-1.4844	-1.7938	0.0094
219500	-1.8438	-1.6812	0.5313
220000	-2.1938	-1.3969	0.1469
220500	-2.9625	-1.2063	0.1594
221000	-2.5406	-1.0031	0.4
221500	-1.9063	-0.6156	0.1187
222000	-2.2375	-0.4969	0.0656
222500	-2.575	-0.3281	0.0688
223000	-2.7406	-0.025	0.3656
223500	-2.0969	0.0906	0.0469
224000	-0.9	0.4625	-0.1
224500	-0.8313	0.8063	0.3875
225000	-0.5781	0.9938	-0.0656
225500	-0.5094	1.2437	-0.1844
226000	-0.2625	1.4875	0.0281
226500	0.2219	1.6344	-0.1719
227000	0.1719	1.7688	-0.3594
227500	-0.6156	1.6594	-0.4437
228000	-0.9781	1.6594	-0.1281
228500	-1.3781	1.6938	-0.3906
229000	-2.0344	1.5938	-0.5625
229500	-1.6187	1.4344	-0.1656
230000	-1.8406	1.4188	-0.6094
230500	-0.9281	1.2906	-0.7344
231000	1.0219	1.3313	-0.4969
231500	1.4844	1.3188	-0.5281
232000	1.6125	1.1688	-0.6375
232500	2.1219	0.8219	-0.8281
233000	2.2906	0.8438	-0.4688
233500	2.0719	0.5437	-0.7375
234000	1.9	0.3563	-0.7656
234500	0.9563	0.0969	-0.3625
235000	-0.6687	-0.1031	-0.725
235500	-1.5688	-0.1844	-0.7969
236000	-0.6969	-0.1969	-0.7656
236500	0.3688	-0.2469	-0.6188
237000	-0.1688	-0.3656	-0.6438
237500	0.8219	-0.35	-0.7312
238000	2.5844	-0.5031	-0.2719
238500	3.8438	-0.3156	-0.6313
239000	5.4719	-0.5719	-0.7531
239500	4.5563	-0.8031	-0.4
240000	1.4	-1.0562	-0.5437
240500	0.2	-1.4125	-0.6313
241000	0.1313	-1.5906	-0.6438
241500	-0.8313	-1.625	-0.4344
242000	-2.0375	-1.8938	-0.4594
242500	-2.7219	-1.7906	-0.5313
243000	-2.5781	-1.7	-0.0375
243500	-2.1437	-1.5531	-0.4125
244000	-1.8188	-1.4063	-0.4906
244500	-0.6969	-1.2219	-0.1875
245000	0.5031	-1.2125	-0.3125
245500	0.7563	-0.9938	-0.3625
246000	1.4906	-0.8	-0.3938
246500	1.6656	-0.6969	-0.1281
247000	1.1969	-0.3594	-0.3688
247500	1.9063	-0.175	-0.4437
248000	1.8563	-0.1	0.1469
248500	1.1187	0.1344	-0.2594
249000	0.8813	0.1063	-0.4375
249500	-0.2219	0.1938	-0.3187
250000	-1.7344	0.2469	-0.4094
250500	-1.5906	0.275	-0.4031
251000	-0.6281	0.4625	-0.4031
251500	-0.7563	0.5406	-0.1437
252000	-0.9531	0.4813	-0.5125
252500	-0.8438	0.6062	-0.5688
253000	0.1313	0.5688	-0.1313
253500	1.4813	0.4844	-0.4344
254000	0.8031	0.4688	-0.5219
254500	0.0125	0.3375	-0.4375
255000	0.0656	0.0625	-0.5469
255500	-0.2938	0.2813	-0.5594
256000	-0.4313	0.1813	-0.7063
256500	-1.0094	0.0719	-0.1375
257000	-1.7406	0.325	-0.5
257500	-1.3062	0.3281	-0.6687
258000	-1.8281	0.3719	-0.3063
258500	-2.7938	0.5094	-0.5375
259000	-2.4969	0.4656	-0.5125
259500	-1.7906	0.6625	-0.3781
260000	-1.2406	1.0219	-0.3313
260500	-0.4281	1.025	-0.4625
261000	-0.4563	1.2063	-0.525
261500	0.2969	1.45	0.0375
262000	2.8094	1.4656	-0.2781
262500	4.4094	1.7563	-0.3281
263000	5.0938	1.6313	-0.1
263500	4.9469	1.5094	-0.3656
264000	3.9219	1.3875	-0.4156
264500	3.0313	0.9938	-0.2875
265000	1.7469	0.6844	-0.1344
265500	0.2625	0.3938	-0.2438
266000	-0.4781	0.0906	-0.3219
266500	-0.7281	-0.1156	0.1344
267000	-0.5156	-0.1063	-0.1906
267500	0.1219	-0.4344	-0.2
268000	0.7563	-0.5281	0.1
268500	1.4656	-0.6938	-0.1688
269000	2.0781	-1.1094	-0.2406
269500	0.8562	-1.2719	-0.1594
270000	-0.1594	-1.5	0.25
270500	-0.6313	-1.7969	0.1437
271000	-1.9937	-1.7344	0.0656
271500	-3.1875	-1.6812	0.5281
272000	-4.0406	-1.6125	0.2594
272500	-5.0594	-1.2156	0.3156
273000	-5.3438	-0.8844	0.4844
273500	-4.9844	-0.6531	0.4813
274000	-5.0406	-0.1969	0.4906
274500	-3.8344	0.1875	0.425
275000	-2.1594	0.5469	0.8969
275500	-0.6875	1.1375	0.7063
276000	0.4156	1.3813	0.5875
276500	0.1938	1.6625	1.0281
277000	-0.0156	2.0563	0.7031
277500	0.6125	2.1313	0.6406
278000	1.1688	2.3344	0.7344
278500	0.9469	2.4406	0.7594
279000	-0.4406	2.3406	0.7094
279500	-2.0063	2.2469	0.5813
280000	-2.4188	2.3156	0.9125
280500	-2.1781	2.1719	0.5844
281000	-2.1063	2.2406	0.5406
281500	-2.1594	2.1437	0.9125
282000	-2.2531	2.0281	0.5594
282500	-1.3813	2.1313	0.5063
283000	-0.0563	2.1375	0.5281
283500	0.1813	1.9719	0.6625
284000	0.7438	1.8938	0.5688
284500	1.1844	1.5875	0.4625
285000	0.1719	1.5094	0.9656
285500	-0.0469	1.4188	0.5406
286000	0.1563	1.1344	0.4594
286500	-0.1906	1.0094	0.8219
287000	-0.2531	1.1844	0.6969
287500	-0.3969	1.0125	0.7281
288000	-0.5281	1.0281	0.7438
288500	-0.0938	1.0813	0.9
289000	-0.4719	0.9938	0.7063
289500	-1.1281	0.8625	0.7875
290000	-0.9156	0.8	1.3062
290500	-1.7281	0.5563	0.9313
291000	-2.1063	0.5437	0.8469
291500	-0.9375	0.5437	1.2219
292000	-0.7063	0.4531	1.0625
292500	-0.8469	0.5969	1.1031
293000	-0.4313	0.4375	1.0562
293500	-1.1812	0.3844	1.4688
294000	-0.4688	0.5188	1.2
294500	1.9688	0.4469	1.1375
295000	2.5063	0.4469	1.6812
295500	1.0938	0.5969	1.3344
296000	0.2906	0.4188	1.2844
296500	0.7031	0.4531	1.3906
297000	1.2063	0.5031	1.2563
297500	0.975	0.3063	1.175
298000	0.5313	0.1313	1.1656
298500	0.1563	0.0688	1.6781
299000	-0.0531	-0.1906	1.275
299500	0.9531	-0.275	1.1375
300000	1.6719	-0.45	1.45
300500	1.0938	-0.8094	1.2344
301000	1.4375	-0.8625	1.1844
301500	1.9688	-1.1719	1.2469
302000	1.4188	-1.5375	1.1531
302500	1.4438	-1.6938	1.0188
303000	0.7906	-1.9688	0.8813
303500	-1.1313	-2.3031	1.3438
304000	-1.5719	-2.2844	1.0156
304500	-1.4656	-2.5219	0.85
305000	-1.9063	-2.6063	1.0313
305500	-2.7938	-2.5	0.6719
306000	-3.8531	-2.5313	0.6656
306500	-4.1344	-2.2781	0.7344
307000	-2.7094	-2.0438	0.7813
307500	-2.2406	-1.8844	0.6031
308000	-2.8781	-1.6781	0.4125
308500	-3.0812	-1.4469	0.8656
309000	-3.2687	-1.0625	0.5156
309500	-2.4531	-0.5875	0.4063
310000	-1.3188	-0.2094	0.6281
310500	-0.6594	-0.1375	0.3531
311000	-0.7031	0.5469	0.2313
311500	-0.7063	0.5938	0.1187
312000	-0.0375	0.6969	0.3938
312500	1.3375	1.55	0.1469
313000	1.4844	1.7781	-0.1094
313500	2.0406	1.65	0.2719
314000	3.0563	1.8344	-0.2406
314500	3.2781	1.8969	-0.3656
315000	4.1188	1.9344	-0.1938
315500	4.6906	1.2188	-0.3875
316000	3.0594	1.0313	-0.575
316500	2.3125	0.2406	-0.7406
317000	3.0656	0.1313	-0.4531
317500	2.8969	0.1063	-0.6531
318000	2.3469	0.0156	-0.8125
318500	1.8188	-0.4875	-0.5344
319000	1	-0.7906	-0.9406
319500	1.025	-0.7219	-1.0063
320000	1.8469	-1.1	-0.9563
320500	1.4375	-1.6406	-0.8906
321000	0.0844	-1.9719	-1.0125
321500	-0.5969	-2.35	-1.1219
322000	0.2562	-2.6437	-0.7344
322500	0.9438	-2.6781	-0.9688
323000	0.2562	-2.9	-1.1094
323500	0.2719	-2.8906	-0.6656
324000	0.7312	-2.8	-0.875
324500	0.7156	-2.7656	-0.9656
325000	1.5156	-2.5625	-1.0156
325500	1.2719	-2.6406	-0.9156
326000	0.1313	-2.7938	-0.9187
326500	0.1156	-2.5781	-0.9469
327000	0.4625	-2.4188	-0.5094
327500	0.8969	-2.3844	-1.0406
328000	1.5719	-2.0844	-1.0969
328500	1.3	-1.8781	-0.7937
329000	1.1313	-1.875	-1.0469
329500	1.5875	-1.6438	-1.125
330000	1.3062	-1.5438	-1.2469
330500	1.1938	-1.6125	-1.1812
331000	0.6719	-1.4375	-1.3188
331500	-0.4938	-1.4781	-1.3844
332000	-0.8562	-1.4344	-0.9406
332500	-1.2281	-1.2094	-1.4
333000	-1.9188	-1.1844	-1.5813
333500	-1.6406	-1.0281	-1.4625
334000	-1.2875	-0.8063	-1.625
334500	-0.9281	-0.8094	-1.6
335000	-0.5594	-0.5844	-1.7219
335500	-0.6438	-0.3688	-1.575
336000	-1.1219	-0.3094	-1.8406
336500	-1.1969	-0.0594	-1.8906
337000	-2.0281	0.0719	-1.2875
337500	-2.6375	0.1281	-1.75
338000	-2.6156	0.5	-1.7688
338500	-3.075	0.6687	-1.6156
339000	-2.5063	0.8562	-1.8406
339500	-1.7594	1.2844	-1.7031
340000	-1.4531	1.4406	-1.7313
340500	-0.4313	1.6	-1.4531
341000	0.2344	1.8969	-1.6719
341500	0.6031	1.9375	-1.7281
342000	0.1813	1.975	-1.2063
342500	-0.7344	2.0781	-1.4406
343000	-1.0375	2.0063	-1.4438
343500	-0.7906	2.0594	-1.3188
344000	-1.2781	2.1563	-1.3594
344500	-1.6875	1.9625	-1.4469
345000	-1.1094	2.0031	-1.4813
345500	-0.9875	2.05	-0.9531
346000	0.1969	1.9406	-1.1187
346500	1.6031	2.0438	-1.2875
347000	1.45	1.8906	-0.9031
347500	1.7125	1.6719	-1.0469
348000	1.6656	1.5781	-1.0031
348500	0.8094	1.5688	-0.8469
349000	0.7406	1.2563	-0.7688
349500	0.7188	0.9938	-0.8281
350000	-0.1313	0.7844	-0.8
350500	-0.7781	0.6875	-0.1688
351000	-1.1313	0.7312	-0.4094
351500	-0.8219	0.5688	-0.3781
352000	-0.4688	0.4719	0.025
352500	-0.9375	0.5094	-0.2094
353000	-0.5437	0.1563	-0.0938
353500	-0.2375	0.0063	0.0313
354000	-1.1688	-0.0031	0.3688
354500	-1.2688	-0.2438	0.225
355000	-1.4375	-0.1906	0.2062
355500	-2.025	-0.1406	0.8375
356000	-0.7937	-0.2688	0.5531
356500	0.3219	0.0625	0.575
357000	-0.0313	0.1063	0.9219
357500	-0.0969	0.1	0.7188
358000	0.4563	0.3438	0.6719
358500	1.1563	0.2156	0.6875
359000	2.2625	0.075	1.05
359500	2.5469	-0.0656	0.9063
360000	1.825	-0.3	0.8281
360500	2.0719	-0.3063	1.2906
361000	2.8438	-0.2469	0.8844
361500	3.4844	-0.5406	0.8906
362000	2.925	-0.6469	1.0188
362500	2.1313	-0.7312	1.0281
363000	3.0844	-1.1313	0.9125
363500	3.2656	-1.3094	0.7906
364000	1.5094	-1.4937	1.0781
364500	-0.0688	-1.9625	0.8438
365000	-0.7969	-2.1156	0.7875
365500	-1.3719	-2.2719	1.2406
366000	-1.4875	-2.3406	0.85
366500	-1.6219	-2.2313	0.775
367000	-1.4438	-2.1844	0.8406
367500	0.3719	-2.0594	0.8688
368000	2.1469	-1.7688	0.7625
368500	1.7188	-1.9375	0.6062
369000	0.8344	-2.1344	0.9781
369500	1.5344	-1.9375	0.6
370000	3.1906	-1.9438	0.5344
370500	3.2031	-1.9563	0.8656
371000	1.7938	-1.9406	0.55
371500	0.2469	-2.0094	0.5031
372000	-0.6531	-1.9312	0.4156
372500	0.4656	-1.7469	0.4969
373000	1.7156	-1.8313	0.3844
373500	0.5594	-1.8844	0.2813
374000	-0.7094	-1.8844	0.7125
374500	0.7094	-1.9344	0.1688
375000	2.25	-1.8188	0.0344
375500	2.2094	-1.8313	0.2688
376000	1.7063	-1.9844	0.0531
376500	1.8031	-1.8344	-0.0563
377000	2.5563	-1.9281	-0.1313
377500	2.8281	-1.9594	-0.0313
378000	1.7031	-1.9688	-0.2344
378500	0.6344	-2.0406	-0.4125
379000	1.6469	-2.0219	0.0781
379500	3.0375	-1.8875	-0.3281
380000	3.3937	-1.8594	-0.5781
380500	2.8063	-1.9438	-0.5344
381000	2.2344	-1.925	-0.6844
381500	2.7844	-2.1688	-0.7188
382000	1.8687	-2.1969	-0.8688
382500	0.3438	-2.2938	-0.6875
383000	-0.1469	-2.5406	-0.9375
383500	-1.0531	-2.4531	-1.1531
384000	-1.4937	-2.3188	-0.6687
384500	-1.4063	-2.3438	-1.0219
385000	-2.0125	-2.0094	-1.1
385500	-1.7625	-1.6969	-1.0438
386000	0.0531	-1.5281	-1.2406
386500	1.7594	-1.175	-1.3219
387000	2.0688	-0.9875	-1.3906
387500	1.5344	-0.8406	-1.0625
388000	2.0688	-0.4531	-1.3781
388500	3.2125	-0.2844	-1.6406
389000	2.4813	-0.1437	-1.2938
389500	0.6531	0.0719	-1.6094
390000	-0.3281	0.0188	-1.6125
390500	-1.1156	0.1969	-1.6344
391000	-0.9656	0.4125	-1.6969
391500	-0.6531	0.2281	-1.8844
392000	-1.9688	0.2844	-1.9688
392500	-2.3844	0.4281	-1.4813
393000	-0.4031	0.3406	-1.8375
393500	0.4063	0.4969	-1.95
394000	-0.3156	0.3844	-1.7531
394500	-1.2156	0.1031	-2.0531
395000	-1.4937	0.2344	-2.0656
395500	-0.9313	0.2562	-1.9563
396000	-0.8375	0.2562	-1.8188
396500	-1.2125	0.5031	-2.0063
397000	-1.4937	0.6344	-2.1219
397500	-1.2344	0.8188	-1.6125
398000	-0.3531	1.1625	-1.9594
398500	-0.4563	1.275	-2.025
399000	-1.7813	1.3062	-1.7563
399500	-2.1437	1.4312	-1.9563
400000	-1.6563	1.4219	-1.9344
400500	-2.8781	1.6031	-1.9188
401000	-3.9844	1.7094	-1.55
401500	-3.2656	1.8219	-1.675
402000	-3.0313	2.1906	-1.7563
402500	-1.8156	2.4531	-1.2688
403000	-0.0469	2.5313	-1.5438
403500	1.2031	2.8406	-1.4688
404000	2.3312	2.9469	-1.2531
404500	2.9125	2.775	-1.2906
405000	3.2469	2.7094	-1.2781
405500	2.7156	2.5375	-1.3281
406000	1.6125	2.1469	-0.9125
406500	0.6344	1.9719	-0.9219
407000	-0.4906	1.6812	-0.9688
407500	-1.4625	1.5219	-0.4437
408000	-0.6594	1.4656	-0.7281
408500	-0.0469	1.2406	-0.6844
409000	-0.9469	1.0906	-0.4156
409500	-0.0906	1.0063	-0.2781
410000	1.7781	0.6844	-0.3125
410500	1.9312	0.5156	-0.2344
411000	1.3844	0.275	0.1938
411500	0.5344	-0.0719	-0.0094
412000	-0.3781	-0.1281	0.1281
412500	-0.8844	-0.2813	0.6906
413000	-2.2687	-0.4906	0.5219
413500	-3.9281	-0.3563	0.5
414000	-5.0656	-0.4594	0.6719
414500	-5.5	-0.5063	0.9406
415000	-5.1656	-0.2531	1.125
415500	-5.2938	-0.1875	1.0562
416000	-5.5656	0.0406	1.6125
416500	-4.3031	0.5719	1.3406
417000	-3.5844	0.8063	1.4719
417500	-3.6781	1.1313	1.9438
418000	-3.7281	1.5688	1.9125
418500	-4.3875	1.6719	1.8656
419000	-4.7375	1.9875	2.0313
419500	-4.3094	2.5094	2.1437
420000	-3.3031	2.8625	2.2313
420500	-2.3813	3.3031	2.2781
421000	-1.1563	3.7875	2.8188
421500	-0.6438	4.0656	2.5219
422000	-0.0375	4.3469	2.3625
422500	1.5469	4.3875	2.6781
423000	1.4156	4.225	2.5875
423500	0.6219	4.1563	2.5281
424000	0.0156	3.8469	2.6031
424500	-0.95	3.6188	2.7125
425000	-1.6688	3.4938	2.5344
425500	-2.3937	3.1219	2.5438
426000	-3.7031	2.9	3.1125
426500	-4.5062	2.7438	2.7438
427000	-4.425	2.4719	2.7438
427500	-3.4625	2.2469	2.8344
428000	-3.0344	2.2344	2.8406
428500	-3.4063	1.9906	2.825
429000	-2.2531	2.0469	2.8937
429500	0.1063	2.1781	3.3125
430000	0.4844	2.1031	2.9938
430500	0.85	2.1938	2.8906
431000	1.2688	2.2188	3.4063
431500	0.9187	2.025	3.1594
432000	1.8062	2.1375	3.1938
432500	3.1594	2.1	3.2625
433000	2.3656	1.9469	3.2188
433500	1.8531	2	3.1437
434000	2.5719	1.9219	3.1125
434500	3.1219	1.7563	3.6281
435000	2.5625	1.6219	3.2531
435500	1.4844	1.1281	3.0187
436000	0.85	0.8469	3.4
436500	0.7469	0.5938	3.1281
437000	0.5469	0.1031	3.1031
437500	0.7219	-0.2062	3.0969
438000	0.6281	-0.5313	3.0719
438500	0.25	-0.8813	2.8719
439000	1.0031	-1.0969	2.7406
439500	1.8531	-1.4813	3.1813
440000	1.4156	-1.8969	2.7031
440500	1	-2.0656	2.6437
441000	1.1688	-2.3531	2.8063
441500	-0.1031	-2.6437	2.4219
442000	-1.4875	-2.7156	2.3094
442500	-1.8469	-2.8844	2.2469
443000	-2.4531	-2.8344	2.3875
443500	-1.9469	-2.5625	2.1219
444000	-0.6719	-2.3656	1.9312
444500	0.0063	-2.1406	2.1656
445000	0.3688	-1.9563	1.7313
445500	0.4281	-1.8313	1.6313
446000	1.2188	-1.7406	1.6938
446500	2.1188	-1.4688	1.3313
447000	2.1656	-1.2781	1.1375
447500	1.6156	-1.5781	0.8719
448000	0.1406	-1.4094	1.0875
448500	-0.8562	-1.6156	0.6563
449000	-0.4906	-1.4937	0.4344
449500	-0.3969	-1.1656	0.6313
450000	-1.2563	-1.3594	0.0656
450500	-1.9875	-1.0656	-0.1437
451000	-2.5187	-0.9594	-0.0969
451500	-1.9188	-1.2063	-0.2594
452000	-0.2562	-1.1156	-0.5
452500	-0.2906	-0.9625	-0.8188
453000	0.0031	-0.975	-0.6062
453500	1.9937	-0.5375	-0.9219
454000	3.425	-0.4813	-1.1438
454500	4.2031	-0.275	-0.9
455000	4.3969	-0.2813	-1.4469
455500	2.9656	-0.3688	-1.6281
456000	1.6438	-0.3938	-1.7031
456500	1.2219	-0.6656	-1.6656
457000	0.5188	-0.6813	-1.8938
457500	-1.4969	-0.725	-2.0469
458000	-3.3563	-0.6875	-1.7125
458500	-3.325	-0.6719	-2.2094
459000	-2.1813	-0.4063	-2.3188
459500	-2.3031	-0.3219	-1.9281
460000	-2.2	-0.3281	-2.2938
460500	-1.0688	-0.2125	-2.4063
461000	-0.4656	-0.0938	-2.5156
461500	1.0469	-0.0313	-2.4562
462000	1.2406	0.0125	-2.4594
462500	-1.0594	-0.1063	-2.6188
463000	-1.4156	-0.1125	-2.1625
463500	-0.4031	0.1281	-2.6063
464000	-0.4719	0.3	-2.5875
464500	-0.5813	0.4344	-2.3438
465000	0.425	0.6969	-2.525
465500	1.3219	0.8344	-2.4625
466000	2.8937	0.9406	-2.6469
466500	4.7344	1.2156	-2.4125
467000	6.6719	1.0656	-2.5969
467500	7.7875	0.9875	-2.6375
468000	7.8594	0.725	-2.175
468500	8.3562	0.3187	-2.5969
469000	8.1469	-0.1187	-2.7031
469500	6.1563	-0.6094	-2.5938
470000	4.9281	-1.2906	-2.6375
470500	3.9531	-1.8438	-2.6375
471000	2.6906	-2.4031	-2.7
471500	2.0344	-2.9219	-2.4
472000	1.3	-3.3063	-2.7125
472500	0.0344	-3.775	-2.7438
473000	0.0219	-4.175	-2.1938
473500	0.1625	-4.35	-2.4594
474000	-0.4344	-4.7	-2.5187
474500	-0.9313	-4.8219	-2.3969
475000	-1.4969	-4.7156	-2.4219
475500	-1.5406	-4.8063	-2.3125
476000	-1.6	-4.5031	-2.3
476500	-1.9937	-4.0875	-1.8125
477000	-1.5531	-3.8	-2.0594
477500	-1.2375	-3.2219	-2.1875
478000	-1.4688	-2.5906	-1.6656
478500	-0.8594	-2.3	-1.8656
479000	-0.9844	-1.6281	-1.8906
479500	-1.4563	-1.2844	-1.7406
480000	-0.9	-0.7781	-1.6969
480500	0.2656	-0.1156	-1.7531
481000	0.8188	0.3563	-1.7531
481500	0.7188	0.7813	-1.2406
482000	0.8656	1.1531	-1.6219
482500	1.2719	1.3344	-1.7844
483000	1.3031	1.3906	-1.4813
483500	0.4625	1.4625	-1.7563
484000	0.5281	1.2406	-1.7281
484500	0.5063	1.175	-1.6938
485000	-0.5656	1.1	-1.6344
485500	-2.0313	0.8625	-1.7688
486000	-3.7938	0.7563	-1.8813
486500	-4.5344	0.7594	-1.2656
487000	-3.6781	0.6813	-1.5281
487500	-3.6094	0.7469	-1.6094
488000	-4.4031	0.8656	-1.3031
488500	-3.9781	0.9688	-1.4438
489000	-3.4219	1.2969	-1.3875
489500	-2.3969	1.6438	-1.2688
490000	-0.5906	1.8156	-0.8719
490500	-0.4531	2.2344	-0.9906
491000	-0.7563	2.3563	-1.0594
491500	-0.175	2.6844	-0.4375
492000	-0.0531	2.975	-0.6406
492500	0.1344	2.9406	-0.4906
493000	0.1281	3.0906	-0.2219
493500	-1.5938	3.2031	-0.1906
494000	-2.1531	3.0969	-0.2031
494500	-1.1906	3.1844	-0.1313
495000	-0.3	3.3406	0.4969
495500	0.9719	3.1531	0.3844
496000	2.2656	3.0969	0.3438
496500	3.2625	2.9625	0.8375
497000	3.6125	2.6063	0.5813
497500	3.3813	2.2844	0.6406
498000	2.9	1.7938	0.9375
498500	3.0719	1.2844	1.0313
499000	1.6531	0.8813	1.1063
499500	-0.0281	0.3656	1.0688
500000	-0.6594	-0.0063	1.5656
500500	-1.6094	-0.2313	1.3656
501000	-1.7031	-0.4469	1.4844
501500	-1.3156	-0.6844	1.925
502000	-1.7063	-0.7813	1.6563
502500	-1.3	-1.0031	1.6844
503000	-1.45	-1.0938	1.8375
503500	-2.2406	-1.0969	2.1656
504000	-2.8688	-1.1625	2.1063
504500	-3.5156	-1.025	2.0812
505000	-4.0875	-0.85	2.6344
505500	-4.425	-0.7	2.3188
506000	-4.5906	-0.2969	2.3469
506500	-4.7594	0.0188	2.7438
507000	-3.3781	0.2375	2.6063
507500	-2.1094	0.8375	2.5
508000	-0.5188	1.1094	2.5094
508500	1.0406	1.3219	2.6813
509000	0.6687	1.5719	2.525
509500	0.6906	1.5969	2.5187
510000	1.3375	1.5719	2.95
510500	1.7844	1.6625	2.4781
511000	1.9937	1.4844	2.3469
511500	1.5469	1.4312	2.5281
512000	1.8125	1.4937	2.3906
512500	2.6406	1.2656	2.2156
513000	2.2781	1.0156	1.9406
513500	1.6313	0.65	2.0781
514000	1.4688	0.0844	1.7844
514500	0.4031	-0.2781	1.6812
515000	0.2125	-0.6563	2.0656
515500	0.3969	-1.1156	1.5313
516000	-1.3	-1.4188	1.4656
516500	-2.2781	-1.6375	1.4688
517000	-2.0187	-1.8625	1.3406
517500	-1.5156	-1.8094	1.2813
518000	-1.1594	-1.9094	1.1812
518500	-0.6375	-2.0063	1.5313
519000	0.0656	-1.8219	1.1563
519500	1.1094	-1.6438	1.0125
520000	2.2406	-1.6156	1.3375
520500	1.9344	-1.3813	1.0156
521000	0.5469	-1.4063	0.9406
521500	-1.3156	-1.3219	0.8656
522000	-2.0031	-1.2531	0.9156
522500	-1.7719	-1.2156	0.7937
523000	-3.2656	-1.0375	0.725
523500	-3.2531	-0.7937	1.2406
